# Supplementary material for: Epidemiology and outcomes of hospital-acquired bloodstream infections in intensive care unit patients: the EUROBACT-2 international cohort study
Source: Springer Nature journal article supplement (doi:10.1007/s00134-022-06944-2), 2023-02-01
Supplement: MOESM1 [file 134_2022_6944_MOESM1_ESM.pdf]

# Epidemiology and outcomes of hospital-acquired bloodstream infections in intensive care units: the EUROBACT II International Cohort Study

## Electronic Supplemental Material (ESM)

### Contents

|                                                                                                                                                                                              |    |
|----------------------------------------------------------------------------------------------------------------------------------------------------------------------------------------------|----|
| Protocol and definitions .....                                                                                                                                                               | 2  |
| Timeline .....                                                                                                                                                                               | 2  |
| Data quality processes .....                                                                                                                                                                 | 2  |
| Definitions .....                                                                                                                                                                            | 2  |
| Sources of Hospital acquired blood stream-infection and source control .....                                                                                                                 | 5  |
| eTable 1 Imputation of missing data .....                                                                                                                                                    | 7  |
| eFigure 1 Flowchart of the Eurobact II study .....                                                                                                                                           | 8  |
| eFigure 2 Geographic distribution of participating ICUs and included patients .....                                                                                                          | 9  |
| eTable 2 Geographic distribution of participating ICUs .....                                                                                                                                 | 10 |
| eTable 3 Characteristics of participating ICUs and patient outcomes .....                                                                                                                    | 11 |
| eTable 4 Additional baseline (admission to the ICU) patient characteristics and day-28 mortality .....                                                                                       | 12 |
| eFigure 3 Proportion of drug resistant pathogens .....                                                                                                                                       | 13 |
| Multivariable models .....                                                                                                                                                                   | 14 |
| Statistical methods for the multivariable models .....                                                                                                                                       | 14 |
| Variable selection for the multivariable models .....                                                                                                                                        | 15 |
| eTable 5 Competing-risks frailty model and comparison with hierarchical logistic model .....                                                                                                 | 16 |
| eFigure 4: Calibration belt for the hierarchical logistic model .....                                                                                                                        | 18 |
| eTable 6 Sensitivity analysis: Hierarchical logistic mixed model with random effects for country and ICU, excluding the 276 patients with a COVID-19 diagnosis. ....                         | 19 |
| eTable 7 Sensitivity analysis: Hierarchical logistic mixed model with random effects for country and ICU, investigating carbapenem resistance instead of difficult to treat resistance. .... | 20 |
| The Eurobact 2 study group: National coordinators, scientific committee, and participating intensive care units. ....                                                                        | 21 |
| References .....                                                                                                                                                                             | 32 |

## Protocol and definitions

### Timeline

The study start date was the 1<sup>st</sup> of August 2019. It was planned to continue for 1 year. Two pilot centers started recruitment on 1/06/2019. Delays caused by the COVID-19 pandemic led to extending the recruitment period up to the 30<sup>st</sup> of January 2021 for the date of HA-BSI. Centers could choose the study start date for their intensive care unit (ICU) between the date of obtention of all required ethical and regulatory approvals and the 31<sup>st</sup> of October 2020. The minimal study recruitment period was 3 months or 10 consecutive cases (whichever came first) and could be extended on request from the local investigator for up to the whole duration of the study. The database was closed on the 12<sup>th</sup> of August 2021.

### Data quality processes

A dual verification and query process was used, including electronic verification of all collected data through a set of coherence routines, and reviewing of each case report form (CRF) by a group of experts (AT, NB, FB) assessing data quality and completeness. Complex cases were reviewed at regular meetings to resolve any disagreement. We excluded patients that did not meet the inclusion criteria and those missing core outcome data (i.e., dates of hospital-acquired bloodstream infection (HA-BSI) and hospital/ICU admission, discharge and/or death as applicable, pathogen and treatment inclusive of antimicrobials and source control as applicable). We ensured correlation between the recorded source, source control and microbiology results. Inserted intravascular catheters are often removed as a possible source of infection in patients who develop sepsis, septic shock, or HA-BSI, we reviewed each case with the investigators in light of clinical progress and microbiology data. We ensured that intravascular catheters that had been removed but ended up not being the source of HA-BSI were not recorded as catheter-related bloodstream infection. Particular attention was given to only include true infections with possible skin contaminants. Any question or incoherence was fed back to the investigator through eCRF-embedded queries and checked until satisfactory resolution. In the absence of a response, we attempted to contact the center, with assistance from the NC, for a minimum of three times. In extreme cases where no response was obtained, or the investigator became unavailable to respond, the patients and/or the center were excluded from the study.

### Definitions

- Intensive care unit: ICUs eligible to participate were defined as managing patients with organ failures within a health-care facility and able to provide invasive mechanical ventilation for a duration of at least 24 hours.
- Ventilator equivalent beds refers to the maximum number of ventilated patients the ICU can accommodate at one time.
- Admission source: refers to where was the patient prior to admission to the ICU.
- Primary diagnosis: The main reason for admission to the ICU. Only one primary diagnosis should be entered (see codes). If surgical admission the site of surgery should be entered as primary diagnosis.
- Type of admission: Surgical - defined as having surgery within 7 days of ICU admission. Elective surgery was defined as surgery scheduled > 24 hours in advance and emergency surgery as that scheduled within 24 hours of operation. All other admissions were considered medical.

- HA-BSIs were defined as isolation of a pathogenic organism from at least one blood culture 48 hours or more after hospital admission; the same 48-hour criterion was used to define ICU-acquired cases among HA-BSIs. For common skin contaminants (coagulase-negative staphylococci, *Corynebacterium* species, *Bacillus* species, *Propionibacterium* species, *Aerococcus* species, *Micrococcus* species), two blood cultures with the same antimicrobial susceptibility profile were mandatory or strong clinical grounds that it is not a contaminant. One example was infected material proven as a source for the HA-BSI. Where strong evidence supported HA-BSI but only one culture was positive (*e.g.*, positive catheter tip following line removal for suspected infection with prescription of additional treatment), all clinical and microbiological data were reviewed to decide whether the case should be included. Patients with BSIs acquired outside the ICU were eligible for inclusion if less than 2 days elapsed between collection of the first positive blood sample and ICU admission and/or if ICU admission was directly related to the consequences of HA-BSI. The inclusion date was the time of collection of the first positive blood culture.
- Comorbidities: Chronic diseases present prior to ICU admission. More than one can be chosen according to the following definitions:
  - Metastatic cancer: Metastases proven by surgery, computed tomography or magnetic resonance scan, or any other method.
  - Hematologic cancer: Lymphoma, Leukaemia.
  - AIDS: HIV positive patients with clinical complications such as *Pneumocystis carinii* pneumonia, Kaposi's sarcoma, lymphoma, tuberculosis, or toxoplasma infection.
  - Chronic renal failure: Defined as either chronic dialysis dependent renal failure or history of chronic renal insufficiency with a serum creatinine > 3.6 g/dL (300 µmol/L).
  - Immunosuppression: Administration within the 6 months prior to ICU admission of corticosteroid treatment (at least 0.3 mg/kg/day prednisolone for at least one month) or other immunosuppressant drugs, severe malnutrition, congenital immune-humoral or cellular immune deficiency state.
  - Chemotherapy/radiotherapy: If within 6 months prior to ICU admission.
  - COPD / Chronic Pulmonary Disease Severe: Chronic restrictive, obstructive or vascular disease resulting in severe exercise limitation (*e.g.*, unable to climb stairs or perform household duties) or documented chronic hypoxia, hypercapnia, secondary polycythaemia, severe pulmonary hypertension (>40 mmHg) or home oxygen or non-invasive ventilation (NIV).
  - Liver disease, severe: Biopsy-proven cirrhosis with portal hypertension; episodes of past upper gastro-intestinal bleeding attributed to portal hypertension; or prior episodes of hepatic failure, encephalopathy, or coma.
- For scoring purposes, we recorded minimal and maximal or worse biological and physiological values of the first 24 hours following ICU admission.
- For the Glasgow coma scale (GCS) we defined the following: For non-sedated patients, enter the lowest GCS during the 24 hours. For patients sedated, enter the GCS at the time of/just prior to sedation. If not available, please enter an estimated GCS score as it would be if the patient was not receiving sedation.

- Delirium: Delirium is defined as an acute or fluctuating mental state (which represents a change from the patient's normal baseline) and is characterized by inattention with altered level of consciousness, agitation or disorganized thought processes. It can be diagnosed by standardized assessment tools such as (but not limited to) the Confusion Assessment Method for ICU (CAM-ICU)  
Hyperactive delirium is characterized by agitation, restlessness, and attempts to remove tubes and lines.  
Hypoactive delirium is characterized by withdrawal, flat affect, apathy, lethargy, and decreased responsiveness.  
Mixed delirium is when patients fluctuate between the two.
- Decision to withhold or withdraw life-sustaining treatment was defined as the ethical decision to change goal of treatment from life-prolonging to palliative. It should only be entered if organ supportive therapy was stopped or not started when it would otherwise have been indicated
- Blood cultures, antimicrobial susceptibility testing, and interpretation were processed locally and following usual practice for each participating centre as detailed in eTable 3.
- Selective reporting of the antibiogram is a laboratory based antimicrobial stewardship process where the laboratory only reports a selection of the antimicrobials that were tested as susceptible for the pathogen. Selective reporting can be used to encourage the use of drugs that are appropriate for the site of infection, discourage the use of drugs for which susceptibility results may be misleading or drugs that may have negative consequences for a patient group or to avoid the overuse of broad-spectrum antibiotics. (see Pulcini et al. 2016 <https://doi.org/10.1016/j.ijantimicag.2016.11.014>).
- Methicillin-resistant *Staphylococcus aureus* (MRSA) and methicillin-resistant (coagulase-negative) *Staphylococcus epidermidis* (MRSE) were defined as resistance to methicillin/oxacillin.
- Vancomycin-resistant enterococci (VRE) were reported as the percentage of *Enterococcus faecium* resistant to vancomycin.
- Carbapenem resistance for Enterobacterales was defined as resistance to at least one carbapenem as recommended by the United States of America Center For Disease Control And Prevention [1].
- Adequate antimicrobial therapy was defined as receiving at least 1 antimicrobial with in-vitro activity for the pathogen at the considered timepoint, with adequacy of antimicrobial selection, dosing and administration manually reviewed for all infections and sources of HA-BSI. Time to antimicrobial therapy for antimicrobials that were ongoing at time of HA-BSI was labelled as "Before BC sampling" and patients were categorized as having received adequate antimicrobial therapy  $\leq 24$  hours after HA-BSI. For the patients without susceptibility data or with incomplete antibiograms, antimicrobial therapy was considered adequate if the intrinsic organism characteristics and usual susceptibilities indicated a high likelihood of drug susceptibility. Antimicrobials administered at ineffective or very low dose and/or route of administration, relative to the source of infection, were considered as not adequate.
- Times are calculated from the time of blood culture sampling, which represents the time 0 of the study as shown in the diagram below.

- Time to adequate antimicrobial therapy was defined as the time between sampling of the study blood culture and receipt of one adequate antimicrobial for each pathogen in the blood culture.

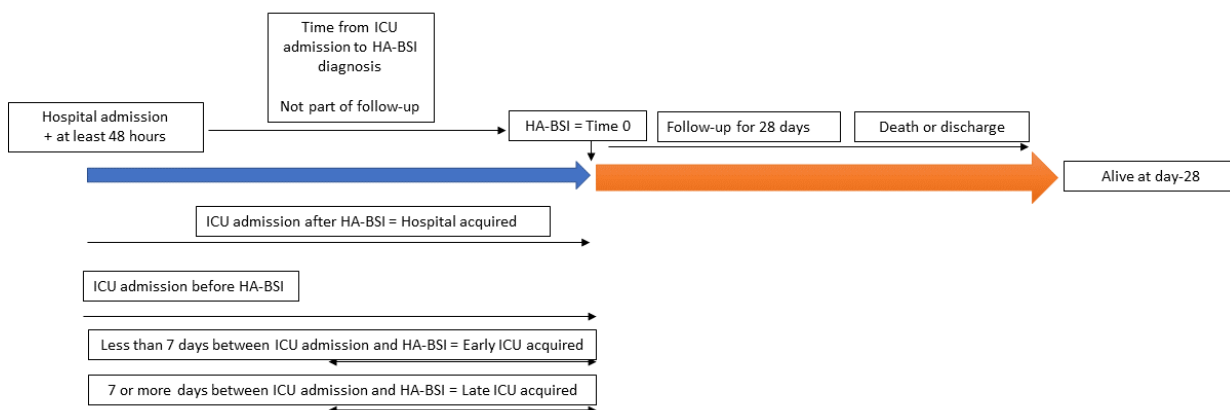

### Sources of Hospital acquired blood stream-infection and source control

The presumed source of the BSI was determined by the treating clinician from the following pre-defined list of categories and subcategories, and if multiple possible sources we requested ordering/numbering in order of likelihood.

- Primary: defined as no clear focus or portal of entry identified
- Catheter-related (Intra-vascular catheter only)
- Respiratory tract
  - Pneumonia
  - Pleural, empyema
  - Tracheobronchitis
- Intra-abdominal
  - Peritonitis
  - Biliary source
  - Other intra-abdominal
- Urinary tract
- Bone or soft tissues
  - Necrotizing fasciitis
  - Other soft tissue
  - Joint or bone
  - Spine
- Endocarditis
- Mediastinitis
- Central Nervous System

Source control was recorded according to the clinician's report as

- Not required
- Required, completed
- Source control required but not achieved

When it was required, we recorded the time, date and effectiveness of the intervention according to pre-defined categories, and if a specimen was sent for microbiology and if it was positive. When patients had multiple interventions we recorded the number of interventions, date of the last intervention and if it was deemed effective after the last intervention.

Source control interventions were recorded according to the following categories

Intravascular catheter Related

- Catheter removal
- Surgical vascular procedure (ligature)

Respiratory tract (pulmonary, pleural, empyema)

- Surgical thoracic
- Percutaneous thoracic (including chest drain)
- Percutaneous mediastinal

Vascular

- Surgical vascular
- Percutaneous vascular
- Other vascular

Cardiac and mediastinal

- Surgical cardiac
- Surgical mediastinal
- Percutaneous mediastinal
- other cardiac or mediastinal

Intra-abdominal

- Surgical abdominal
- Percutaneous abdominal
- Surgical other (mediastinal, pleural, ...)
- Percutaneous other (mediastinal, pleural, ...)

Urinary tract

- Surgical urinary (JJ stent)
- Surgical urinary (nephrectomy or other)
- Percutaneous urinary (nephrostomy)
- Other urinary

Bone or soft tissues

- Surgical skin
- Surgical bone
- Other bone or soft tissue

Other

- Percutaneous other
- Surgical other
- Other

eTable 1 Imputation of missing data.

| Variable                                                  | Number of missing values |               | Imputed value                            |
|-----------------------------------------------------------|--------------------------|---------------|------------------------------------------|
|                                                           | Center level             | Patient level |                                          |
| Type of ICU                                               | 6                        | 15            | Mixed (medical-surgical)                 |
| Clinical pharmacists are consulted                        | 11                       | 69            | Available only during business hours     |
| Aminoglycosides                                           | 7                        | 25            | TDM is available everyday                |
| Vancomycin                                                | 7                        | 25            | TDM is available everyday                |
| Number of ventilator-equivalent beds in the ICU $\geq 15$ | 6                        | 15            | <15                                      |
| Septic shock in class                                     | n/a                      | 8             | No sepsis or sepsis without septic shock |
| Time before adequate treatment                            | n/a                      | 2             | 24-48 hours                              |

We used simple imputation of missing data to the median for continuous variables and to the mode for categorical variables.

Missing times of blood culture sampling (n=26) and antibiotic start time (n=160) were imputed at 12:00 p.m.

TDM: therapeutic drug monitoring.

eFigure 1 Flowchart of the Eurobact II study

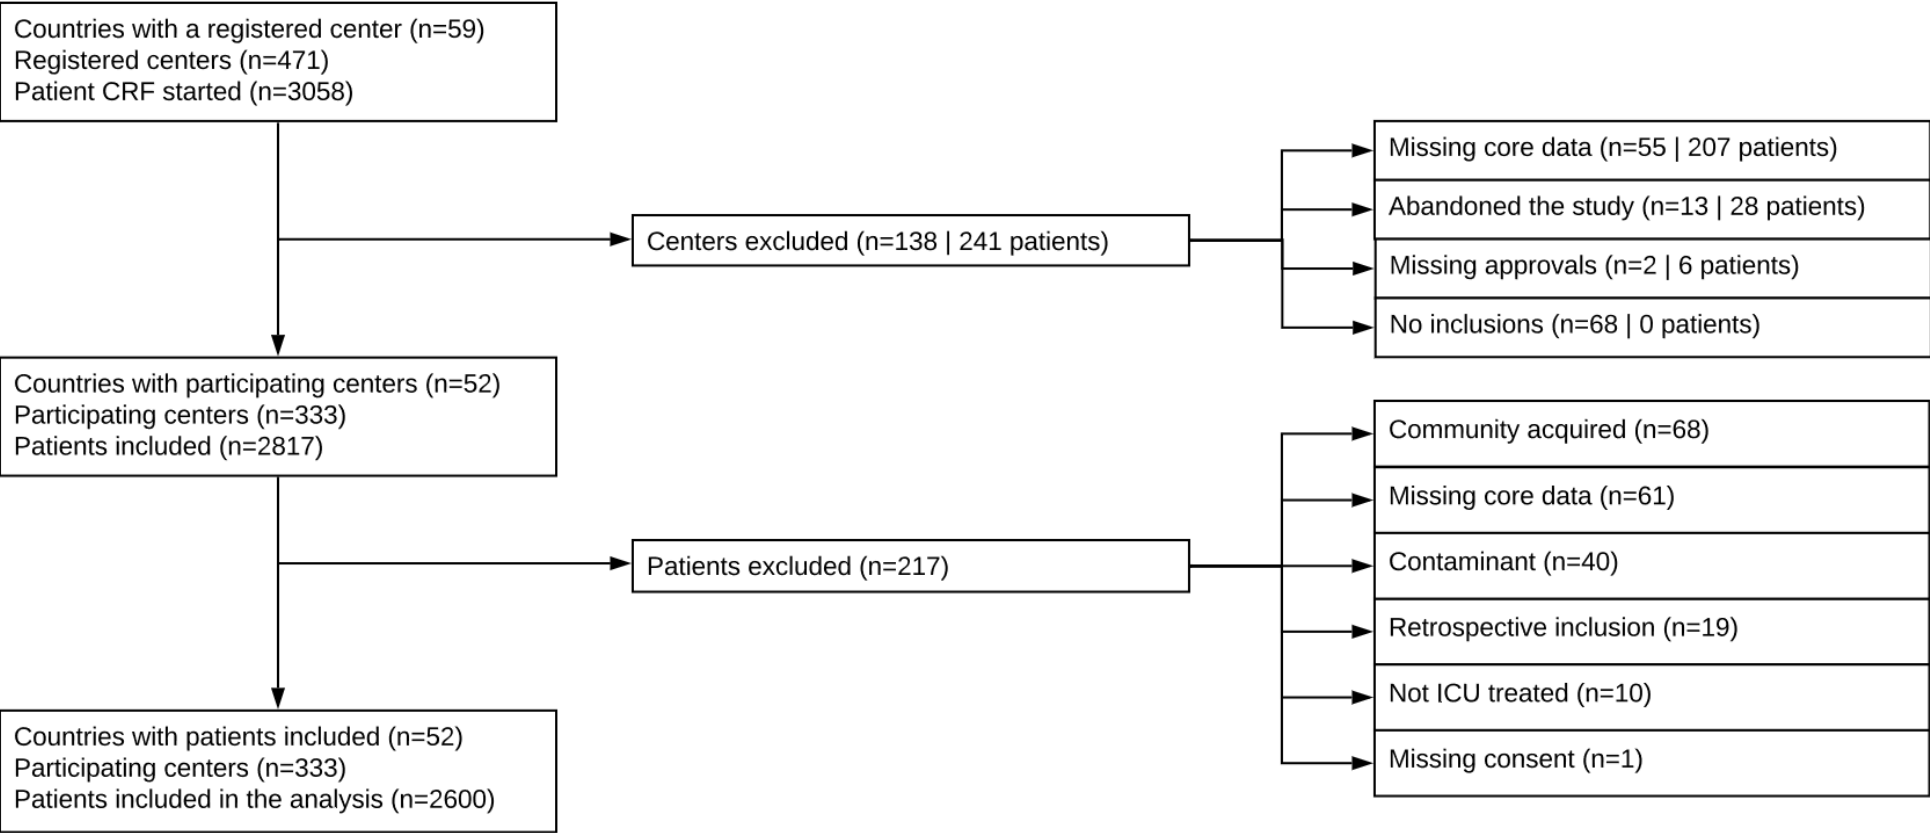



eFigure 2 Geographic distribution of participating ICUs and included patients

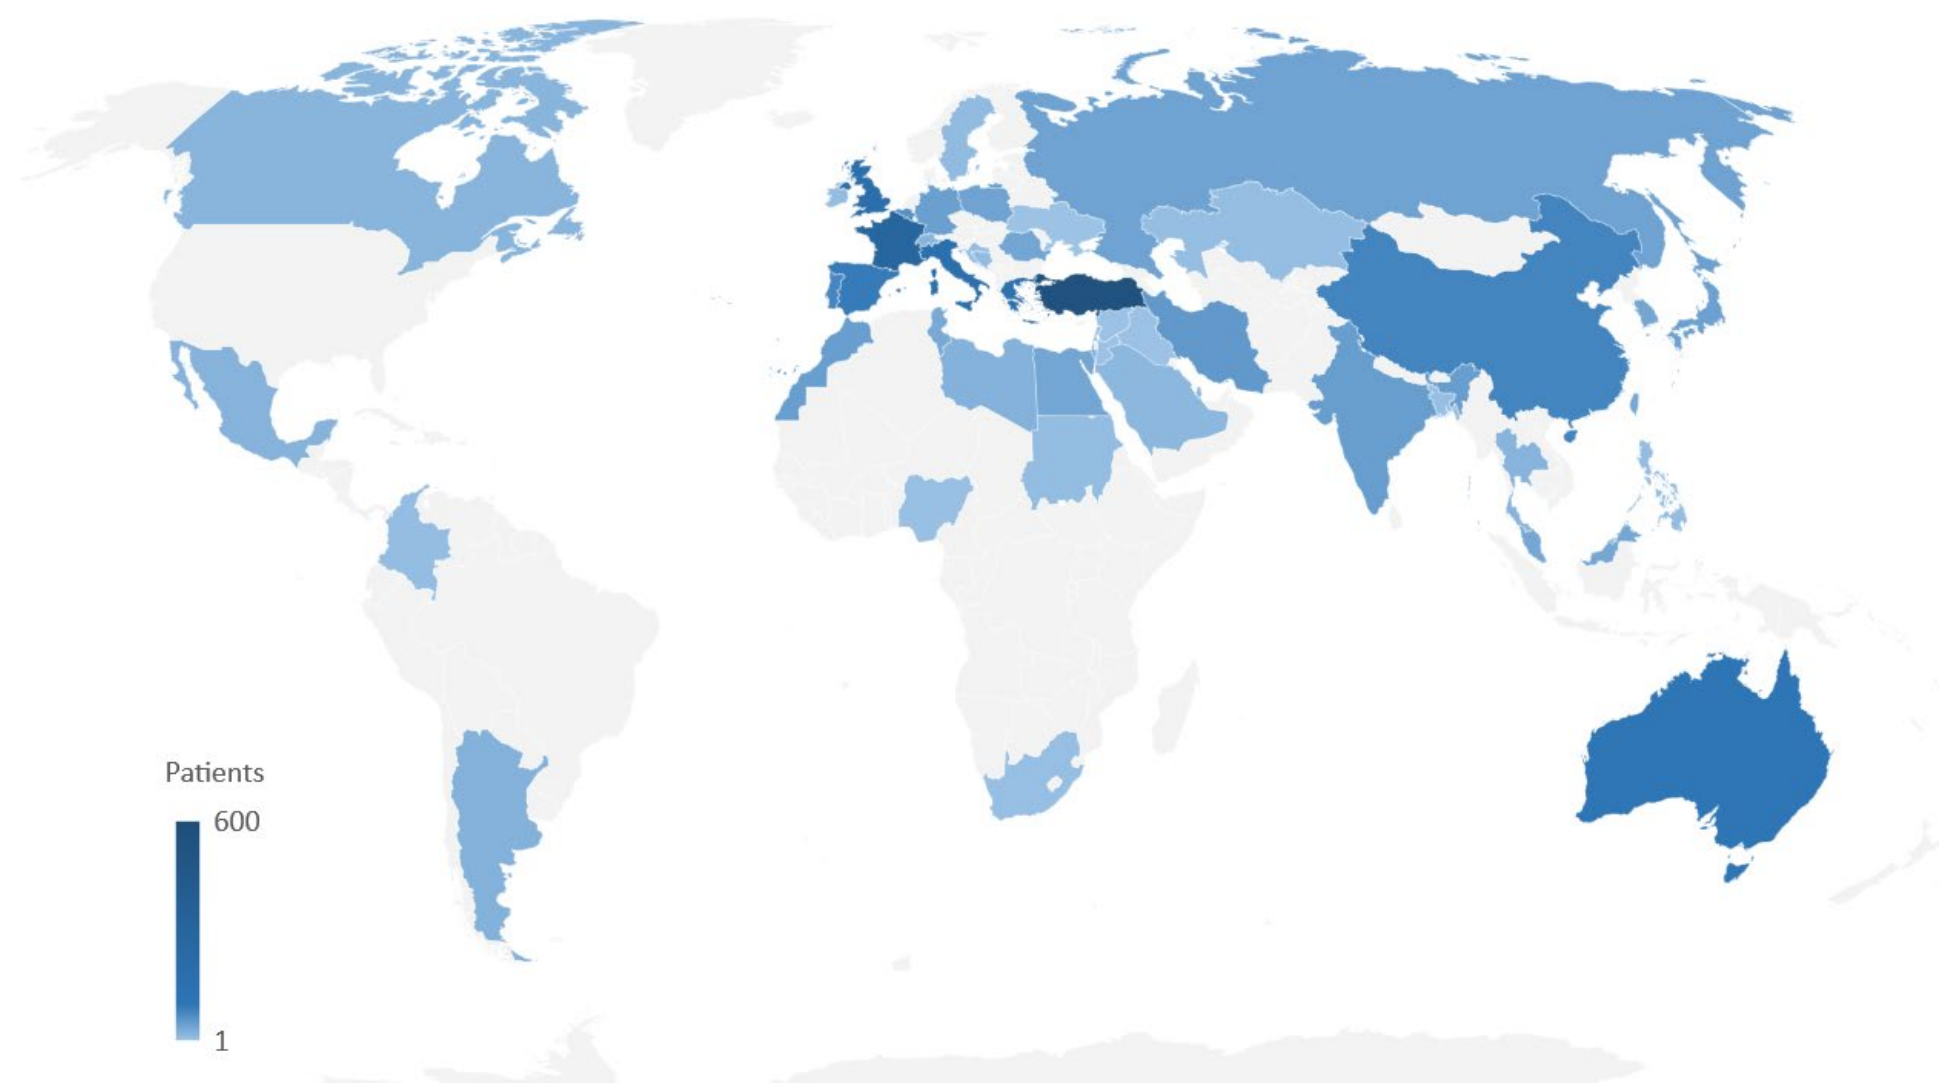

Legend: World-map participating countries and territories. Colour gradient denotes the number of included patients in each country.

eTable 2 Geographic distribution of participating ICUs

|                                        | ICUs      | Patients   |                                | ICUs       | Patients    |
|----------------------------------------|-----------|------------|--------------------------------|------------|-------------|
| <b>East Asia and Pacific</b>           | <b>69</b> | <b>412</b> | <b>Europe and Central Asia</b> | <b>184</b> | <b>1775</b> |
| Australia                              | 14        | 99         | Belgium                        | 12         | 64          |
| Brunei                                 | 4         | 29         | Bosnia and Herzegovina         | 1          | 10          |
| China                                  | 15        | 80         | Croatia                        | 2          | 7           |
| Hong Kong                              | 1         | 5          | France                         | 35         | 288         |
| Japan                                  | 11        | 44         | Germany                        | 6          | 46          |
| Malaysia                               | 6         | 36         | Greece                         | 19         | 144         |
| Philippines                            | 1         | 8          | Italy                          | 10         | 160         |
| Republic of Korea                      | 5         | 38         | Kazakhstan                     | 2          | 7           |
| Singapore                              | 6         | 18         | Poland                         | 6          | 41          |
| Taiwan                                 | 4         | 35         | Portugal                       | 13         | 78          |
| Thailand                               | 2         | 20         | Republic of Ireland            | 1          | 8           |
| <b>Middle East and North Africa</b>    | <b>48</b> | <b>268</b> | Romania                        | 5          | 38          |
| Dubai                                  | 1         | 10         | Russian Federation             | 5          | 41          |
| Egypt                                  | 7         | 38         | Spain                          | 13         | 92          |
| Iran                                   | 13        | 54         | Sweden                         | 3          | 11          |
| Iraq                                   | 1         | 2          | Switzerland                    | 2          | 20          |
| Israel                                 | 2         | 19         | Turkey                         | 24         | 547         |
| Lebanon                                | 1         | 7          | UK                             | 24         | 172         |
| Libya                                  | 5         | 22         | Ukraine                        | 1          | 1           |
| Morocco                                | 7         | 47         | <b>North America</b>           | <b>2</b>   | <b>19</b>   |
| Qatar                                  | 3         | 17         | Canada                         | 2          | 19          |
| Saudi Arabia                           | 3         | 15         | <b>South Asia</b>              | <b>14</b>  | <b>54</b>   |
| Syria                                  | 2         | 2          | Bangladesh                     | 2          | 6           |
| Tunisia                                | 2         | 33         | India                          | 12         | 48          |
| Jordan                                 | 1         | 2          | <b>Sub-Saharan Africa</b>      | <b>5</b>   | <b>20</b>   |
| <b>Latin America and the Caribbean</b> | <b>11</b> | <b>52</b>  | Nigeria                        | 2          | 5           |
| Argentina                              | 4         | 23         | South Africa                   | 1          | 6           |
| Colombia                               | 1         | 8          | Sudan                          | 2          | 9           |
| Mexico                                 | 6         | 21         |                                |            |             |

Legend: Number of participating ICUs and included patients in the Eurobact-2 database.

eTable 3 Characteristics of participating ICUs and patient outcomes

| Characteristics *                                                                       | All ICUs<br>(n=333)* | All patients<br>(N= 2600) | Dead on D28<br>(n= 966) | Alive on D28<br>(n= 1634) | OR [95% CI]       | P value |
|-----------------------------------------------------------------------------------------|----------------------|---------------------------|-------------------------|---------------------------|-------------------|---------|
| <b>Funding of the hospital</b>                                                          |                      |                           |                         |                           |                   |         |
| Public                                                                                  | 274 (83.8)           | 2198 (85)                 | 808 (83.8)              | 1390 (85.7)               | 1                 | 0.844   |
| Private                                                                                 | 35 (10.7)            | 263 (10.2)                | 108 (11.2)              | 155 (9.6)                 | 1.06[0.73; 1.55]  | .       |
| Mixed                                                                                   | 18 (5.5)             | 124 (4.8)                 | 48 (5)                  | 76 (4.7)                  | 1.14[0.69; 1.88]  | .       |
| <b>Structure of the ICU</b>                                                             |                      |                           |                         |                           |                   |         |
| Closed-ICU                                                                              | 246 (75.2)           | 2039 (78.9)               | 739 (76.7)              | 1300 (80.2)               | 1                 | 0.2     |
| Open-ICU                                                                                | 81 (24.8)            | 546 (21.1)                | 225 (23.3)              | 321 (19.8)                | 1.19[0.91; 1.56]  | .       |
| <b>Specific Recruitment **</b>                                                          |                      |                           |                         |                           |                   |         |
| General ICU                                                                             | 300 (91.7)           | 2440 (94.4)               | 924 (95.9)              | 1516 (93.5)               | 1.46[0.9; 2.36]   | 0.124   |
| Paediatric \$                                                                           | 20 (6.1)             | 124 (4.8)                 | 32 (3.3)                | 92 (5.7)                  | 0.55[0.32; 0.93]  | 0.025   |
| Cardiac-surgical                                                                        | 86 (26.3)            | 638 (24.7)                | 221 (22.9)              | 417 (25.7)                | 0.92[0.71; 1.2]   | 0.534   |
| Coronary-care                                                                           | 89 (27.2)            | 559 (21.6)                | 194 (20.1)              | 365 (22.5)                | 0.99[0.76; 1.3]   | 0.955   |
| Post-operative                                                                          | 235 (71.9)           | 1895 (73.3)               | 681 (70.6)              | 1214 (74.9)               | 0.76[0.59; 0.97]  | 0.031   |
| Neuro-surgical                                                                          | 158 (48.3)           | 1373 (53.1)               | 503 (52.2)              | 870 (53.7)                | 0.77[0.61; 0.96]  | 0.024   |
| Trauma                                                                                  | 197 (60.2)           | 1574 (60.9)               | 584 (60.6)              | 990 (61.1)                | 0.9[0.71; 1.14]   | 0.389   |
| Burns                                                                                   | 65 (19.9)            | 446 (17.3)                | 161 (16.7)              | 285 (17.6)                | 1.07[0.8; 1.43]   | 0.629   |
| <b>Number of ventilator equivalent beds in the ICU</b>                                  | 14 [10; 21]          | 15 [11; 22]               | 14 [11; 22]             | 15 [11; 23]               | 1 [0.99; 1]       | 0.415   |
| <b>Number high-dependency unit (HDU) beds in the ICU</b>                                | 0 [0; 6]             | 0 [0; 6]                  | 0 [0; 5]                | 0 [0; 6]                  | 0.99[0.98; 1.01]  | 0.227   |
| <b>Antibiotic choice is guided by **</b>                                                |                      |                           |                         |                           |                   |         |
| Local guidelines                                                                        | 194 (59.3)           | 1417 (54.8)               | 472 (49)                | 945 (58.3)                | 0.87[0.69; 1.11]  | 0.265   |
| National/international guidelines                                                       | 195 (59.6)           | 1570 (60.7)               | 551 (57.2)              | 1019 (62.9)               | 0.89[0.7; 1.12]   | 0.311   |
| Surveillance cultures                                                                   | 157 (48)             | 1318 (51)                 | 487 (50.5)              | 831 (51.3)                | 0.93[0.75; 1.17]  | 0.556   |
| Consultation with ID, clinical microbiologists or pharmacists                           | 135 (41.3)           | 1230 (47.6)               | 485 (50.3)              | 745 (46)                  | 0.98[0.76; 1.25]  | 0.844   |
| The treating physician                                                                  | 222 (67.9)           | 1648 (63.8)               | 572 (59.3)              | 1076 (66.4)               | 0.94[0.73; 1.22]  | 0.658   |
| <b>SOD or SDD</b>                                                                       |                      |                           |                         |                           |                   |         |
| In All ICU patients                                                                     | 58 (17.8)            | 296 (11.6)                | 180 (19)                | 342 (21.3)                | 1                 | 0.211   |
| In a selected group of patients                                                         | 38 (11.7)            | 1735 (68)                 | 95 (10)                 | 201 (12.5)                | 0.97[0.63; 1.51]  | .       |
| Never                                                                                   |                      |                           | 672 (71)                | 1063 (66.2)               | 1.23[0.92; 1.65]  |         |
| Inside the hospital or same campus                                                      | 296 (90.5)           | 2378 (92)                 | 897 (93)                | 1481 (91.4)               | 1                 | 0.229   |
| At another hospital with a partnership or agreement                                     | 25 (7.6)             | 178 (6.9)                 | 52 (5.4)                | 126 (7.8)                 | 0.79[0.5; 1.25]   |         |
| Off-site at an independent microbiology laboratory                                      | 6 (1.8)              | 29 (1.1)                  | 15 (1.6)                | 14 (0.9)                  | 1.93[0.74; 5.06]  |         |
| <b>Selective reporting of antibiogram</b>                                               |                      |                           |                         |                           |                   |         |
| Not selective                                                                           | 155 (48)             | 1304 (50.9)               | 471 (49.1)              | 788 (49.2)                | 1                 | 0.679   |
| Selective                                                                               | 168 (52)             | 1259 (49.1)               | 489 (50.9)              | 815 (50.8)                | 0.95[0.75; 1.21]  |         |
| <b>Recommendations used for the interpretation of antibiotic susceptibility testing</b> |                      |                           |                         |                           |                   |         |
| EUCAST                                                                                  | 194 (60.06)          | 1827 (71.56)              | 1121 (70.2)             | 706 (73.8)                | 1                 | 0.802   |
| CLSI                                                                                    | 116 (35.91)          | 671 (26.28)               | 436 (27.3)              | 235 (24.6)                | 0.92 [0.69; 1.21] |         |
| Other                                                                                   | 13 (4.02)            | 55 (2.15)                 | 39 (2.4)                | 16 (1.7)                  | 0.89 [0.43; 1.85] |         |

Legend: results reported as n (%) for categorical variables and median [IQR] for continuous variables; \* All Center data was missing for 6 ICUs and 7 to 12 did not provide staffing or stewardship data. \*\* Percentage does not equate to 100% because multiple categories could be selected. \$: Refers to ICUs with paediatric admission capacity – Only adult patients could be included in the study. \*\*\* There were 4 ICUs and 11 patients in the Low-income category Selective reporting of antibiogram results refers to the reporting to the clinician of a selection only of the tested antibiotics. 24/7: 24 hours a day, 7 days a week. ICU: intensive care unit, SOD: selective oral decontamination, SDD: selective digestive decontamination. TDM: therapeutic drug monitoring. Ventilator equivalent beds refers to the maximum number of ventilated patients the ICU can accommodate at one time.

eTable 4 Additional baseline (admission to the ICU) patient characteristics and day-28 mortality

| Variable                                  | All patients<br>(N= 2600) | Dead on<br>D28<br>(n= 966) | Alive on D28<br>(n= 1634) | OR [95% CI]       | p-Value |
|-------------------------------------------|---------------------------|----------------------------|---------------------------|-------------------|---------|
| <b>Chronic illnesses*</b>                 |                           |                            |                           |                   |         |
| Moderate COPD                             | 304 (11.7)                | 111 (11.5)                 | 193 (11.8)                | 0.98 [0.76; 1.28] | 0.905   |
| Severe COPD                               | 112 (4.3)                 | 43 (4.5)                   | 69 (4.2)                  | 1.09 [0.72; 1.64] | 0.685   |
| Heart Failure (NYHA 3)                    | 217 (8.3)                 | 112 (11.6)                 | 105 (6.4)                 | 1.83 [1.35; 2.47] | <.001   |
| Heart Failure (NYHA 4)                    | 60 (2.3)                  | 27 (2.8)                   | 33 (2)                    | 1.37 [0.79; 2.36] | 0.26    |
| Previous myocardial infarction            | 239 (9.2)                 | 100 (10.4)                 | 139 (8.5)                 | 1.27 [0.95; 1.69] | 0.102   |
| Peripheral vascular disease               | 176 (6.8)                 | 84 (8.7)                   | 92 (5.6)                  | 1.74 [1.25; 2.42] | 0.001   |
| Cerebrovascular disease                   | 277 (10.7)                | 103 (10.7)                 | 174 (10.6)                | 0.94 [0.71; 1.23] | 0.631   |
| Dementia                                  | 109 (4.2)                 | 46 (4.8)                   | 63 (3.9)                  | 0.98 [0.64; 1.49] | 0.919   |
| Hemiplegia                                | 70 (2.7)                  | 20 (2.1)                   | 50 (3.1)                  | 0.64 [0.37; 1.11] | 0.112   |
| Diabetes without end organ damage         | 476 (18.3)                | 188 (19.5)                 | 288 (17.6)                | 1.16 [0.94; 1.44] | 0.174   |
| Diabetes with end organ damage            | 272 (10.5)                | 118 (12.2)                 | 154 (9.4)                 | 1.15 [0.87; 1.51] | 0.316   |
| Renal disease, moderate                   | 256 (9.8)                 | 103 (10.7)                 | 153 (9.4)                 | 1.17 [0.88; 1.55] | 0.282   |
| Renal disease, severe (chronic dialysis)  | 129 (5)                   | 51 (5.3)                   | 78 (4.8)                  | 1.09 [0.74; 1.59] | 0.671   |
| Connective tissue disease                 | 67 (2.6)                  | 31 (3.2)                   | 36 (2.2)                  | 1.54 [0.92; 2.59] | 0.1     |
| Ulcer disease (gastro-duodenal)           | 87 (3.3)                  | 32 (3.3)                   | 55 (3.4)                  | 1.02 [0.63; 1.64] | 0.949   |
| Liver disease, mild to moderate           | 93 (3.6)                  | 39 (4)                     | 54 (3.3)                  | 1.42 [0.91; 2.2]  | 0.119   |
| Liver disease, severe                     | 67 (2.6)                  | 33 (3.4)                   | 34 (2.1)                  | 1.76 [1.06; 2.94] | 0.03    |
| Immunosuppression                         |                           |                            |                           |                   |         |
| Steroids                                  | 134 (5.2)                 | 60 (6.2)                   | 74 (4.5)                  | 1.49 [1.03; 2.16] | 0.034   |
| Chemotherapy/Radiotherapy within 6 months | 220 (8.5)                 | 93 (9.6)                   | 127 (7.8)                 | 1.37 [1.01; 1.85] | 0.044   |
| Targeted therapy for cancer               | 57 (2.2)                  | 28 (2.9)                   | 29 (1.8)                  | 1.8 [1.03; 3.14]  | 0.039   |
| Organ Transplant                          | 73 (2.8)                  | 26 (2.7)                   | 47 (2.9)                  | 0.93 [0.55; 1.56] | 0.78    |
| AIDS                                      | 16 (0.6)                  | 7 (0.7)                    | 9 (0.6)                   | 1.73 [0.6; 5.01]  | 0.312   |
| Other immunosuppression                   | 95 (3.7)                  | 39 (4)                     | 56 (3.4)                  | 1.21 [0.78; 1.88] | 0.401   |
| <b>Source of ICU admission</b>            |                           |                            |                           |                   |         |
| Hospital ward/floor, n (%)                | 1101 (42.3)               | 436 (45.1)                 | 665 (40.7)                | 1                 | 0.078   |
| Emergency department                      | 764 (29.4)                | 275 (28.5)                 | 489 (29.9)                | 0.76 [0.61; 0.93] |         |
| Other hospital, n (%)                     | 352 (13.5)                | 136 (14.1)                 | 216 (13.2)                | 0.92 [0.71; 1.2]  |         |
| Operating Room/recovery                   | 286 (11)                  | 89 (9.2)                   | 197 (12.1)                | 0.75 [0.56; 1.01] |         |
| Other intermediate care unit, n (%)       | 69 (2.7)                  | 21 (2.2)                   | 48 (2.9)                  | 0.66 [0.37; 1.17] |         |
| Other, n (%)                              | 28 (1.1)                  | 9 (0.9)                    | 19 (1.2)                  | 0.71 [0.3; 1.67]  |         |
| <b>Primary diagnosis at ICU admission</b> |                           |                            |                           |                   |         |
| Sepsis or septic shock                    | 530 (20.4)                | 189 (19.6)                 | 341 (20.9)                | 1                 | <.001   |
| Cardiac arrest                            | 91 (3.5)                  | 39 (4)                     | 52 (3.2)                  | 1.2 [0.75; 1.94]  |         |
| Cardio-vascular causes                    | 137 (5.3)                 | 45 (4.7)                   | 92 (5.6)                  | 0.86 [0.56; 1.31] |         |
| Gastro-intestinal causes                  | 85 (3.3)                  | 36 (3.7)                   | 49 (3)                    | 1.27 [0.78; 2.07] |         |
| Hypovolemic or Haemorrhagic shock         | 46 (1.8)                  | 16 (1.7)                   | 30 (1.8)                  | 1.02 [0.53; 1.97] |         |
| Metabolic causes                          | 44 (1.7)                  | 11 (1.1)                   | 33 (2)                    | 0.57 [0.27; 1.18] |         |
| Multiple trauma (no TBI)                  | 93 (3.6)                  | 19 (2)                     | 74 (4.5)                  | 0.42 [0.24; 0.74] |         |
| Neurologic causes                         | 286 (11)                  | 74 (7.7)                   | 212 (13)                  | 0.55 [0.39; 0.78] |         |
| COVID-19**                                | 336 (12.9)                | 195 (20.2)                 | 141 (8.6)                 | 2.04 [1.48; 2.83] |         |
| Post-Operative admission                  | 258 (9.9)                 | 83 (8.6)                   | 175 (10.7)                | 0.83 [0.6; 1.16]  |         |
| Renal failure                             | 46 (1.8)                  | 14 (1.4)                   | 32 (2)                    | 0.75 [0.38; 1.49] |         |
| Respiratory admission                     | 550 (21.2)                | 232 (24)                   | 318 (19.5)                | 1.13 [0.87; 1.47] |         |
| Traumatic brain injury                    | 93 (3.6)                  | 11 (1.1)                   | 82 (5)                    | 0.2 [0.1; 0.4]    |         |
| Other                                     | 5 (0.2)                   | 2 (0.2)                    | 3 (0.2)                   | 1.14 [0.18; 7.35] |         |

Legend: Continuous variables are presented as median [IQR] and categorical variables as n(%). COPD: chronic obstructive pulmonary disease, ICU: intensive care unit, NYHA: New York heart association, AIDS: acquired immunodeficiency syndrome, TBI: Traumatic brain injury \*\* Respiratory admission refers to admission for respiratory failure other than COVID-19 that has been categorized separately.

eFigure 3 Proportion of drug resistant pathogens

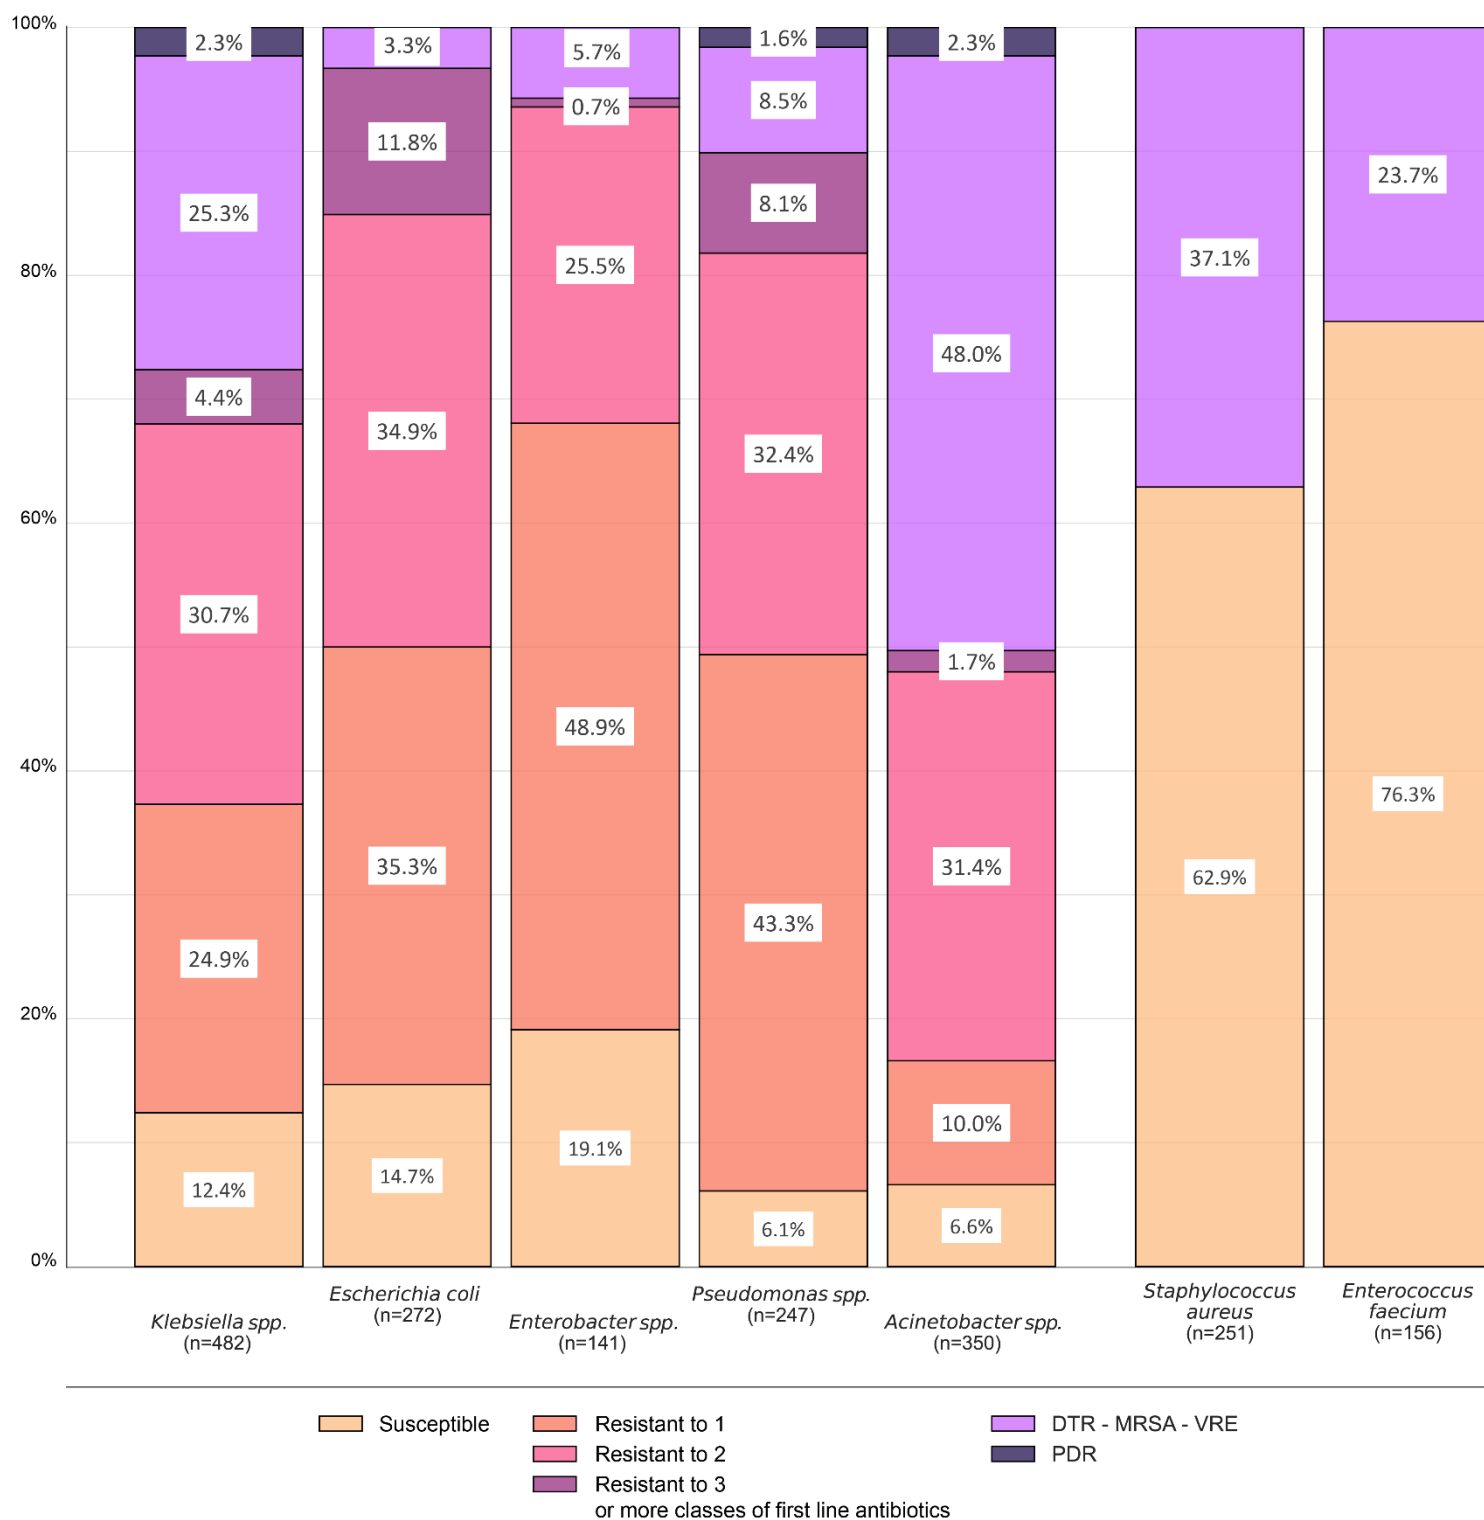

Legend: Resistant to 1, 2 or 3 or more first line antibiotics was assessed among carbapenem,  $\beta$ -lactam, and fluoroquinolone categories and if tested piperacillin-tazobactam and ampicillin-sulbactam (*Acinetobacter spp.* ly) and aztreonam (not applicable for *Acinetobacter spp.*). DTR = difficult to treat resistance, PDR = Pandrug resistant (resistant to all tested antibiotics). DTR assessment requires antibiogram results for  $\geq 1$  carbapenem,  $\geq 1$  extended-spectrum cephalosporin, and  $\geq 1$  fluoroquinolone. PDR status only assessed for DTR pathogens. All PDR micro-organisms are DTR. MRSA= methicillin resistant *Staphylococcus aureus*

## Multivariable models

### Statistical methods for the multivariable models

To identify factors associated with day-28 death, we built a three-tiered hierarchical logistic mixed model using the GLIMMIX procedure of the SAS software. The variables were organized into 3 tiers: country, ICU, and patient. The effects of country-based and center-based variables on the day28 survival were included as random intercepts. Multilevel modelling takes into account the hierarchical structure of the data, which may manifest as intraclass correlations [2]. To obtain a conservative estimate of the standard error, a separate random-error term was specified for each level of the analysis. Therefore, to avoid overestimating the significance of risk factors of day-28 mortality, we took intraclass correlations into account, and we specified a separate random-error term for each tier. Variables potentially associated with death were introduced into the multivariable model. The hierarchical model comprised three levels: country (level 3), center (level 2), and patient (level 1). All variables not obviously correlated (e.g., SOFA score and vasopressor use, age or temperature and SAPS II excluding age related points) with P-values less than 0.10 by univariate analysis were introduced into the multivariable model. We did not correct for multiplicity of statistical tests. Owing to the low number of missing values, simple imputation to the median for continuous variables and to the mode for categorical variables was used (ESM eTable 1). The COVID-19 status was not included in the multivariable analysis because of co-linearity of the admission diagnosis with sepsis or septic shock. To mitigate the bias (*i.e.*, high mortality and different epidemiology of HA-BSI) introduced by patients infected with SARS-CoV-2 [3], we performed a sensitivity analysis excluding the 276 COVID-19 patients. Following the peer review process, and to mitigate the risk of bias introduced by logistic regression with day-28 mortality as an outcome variable (*i.e.*, a substantial part of the cohort was still in the ICU), we computed a competing-risk, subdistribution hazard frailty model as suggested by Fine and Gray [4]. We introduced ICU discharge as a competing risk and a random centre effect to model cluster dependence on the cumulative incidence function of the event of interest in the presence of competing events using the `finalfit()` package of the R software

## Variable selection for the multivariable models.

Variable selection for the multivariable models used full pre-specification and was performed as follows:

At database close a selection of clinically relevant variables was made to be presented in the manuscript and in the multivariable model. All candidate variables that were statistically significant with a threshold of 10% were included in the multivariable model. There was no stepwise process. We excluded variables that involved less than 5% of the cohort and those that were deemed collinear because of overlapping or used in the calculation of scores as shown in the table below.

| Level   | Variable                                                  | Selected for multivariable analysis | reason                                                                                                                                                                                                                                                       |
|---------|-----------------------------------------------------------|-------------------------------------|--------------------------------------------------------------------------------------------------------------------------------------------------------------------------------------------------------------------------------------------------------------|
| Country | National income                                           | Yes                                 |                                                                                                                                                                                                                                                              |
| Center  | Type of ICU                                               | Yes                                 |                                                                                                                                                                                                                                                              |
| Center  | Paediatric                                                | No                                  | Collinear with type of ICU                                                                                                                                                                                                                                   |
| Center  | Post-operative                                            | No                                  |                                                                                                                                                                                                                                                              |
| Center  | Neuro-surgical                                            | No                                  |                                                                                                                                                                                                                                                              |
| Center  | Number of Ventilator equivalent beds in the ICU $\geq 15$ | Yes                                 |                                                                                                                                                                                                                                                              |
| Center  | Clinical pharmacists are consulted                        | Yes                                 |                                                                                                                                                                                                                                                              |
| Center  | TDM of aminoglycosides is available                       | Yes                                 |                                                                                                                                                                                                                                                              |
| Center  | TDM of vancomycin is available                            | Yes                                 |                                                                                                                                                                                                                                                              |
| Patient | Age                                                       | Yes                                 |                                                                                                                                                                                                                                                              |
| Patient | SAPS-II on admission, excluding Age related points        | Yes                                 | SAPS-II score was computed excluding age related points to avoid collinearity with the variable Age.                                                                                                                                                         |
| Patient | Charlson co-morbidity index in class                      | Yes                                 |                                                                                                                                                                                                                                                              |
| Patient | Solid-tumours – Proven metastasis                         | No                                  | Already included as part of the computation of the SAPS-II score.                                                                                                                                                                                            |
| Patient | Haematological malignancy (Leukaemia or lymphoma)         | No                                  |                                                                                                                                                                                                                                                              |
| Patient | Immunosuppression: Steroids                               | Yes                                 |                                                                                                                                                                                                                                                              |
| Patient | Chemotherapy / radiotherapy within 6 months               | Yes                                 |                                                                                                                                                                                                                                                              |
| Patient | Targeted Cancer Therapy (ongoing)                         | No                                  | Size < 5%                                                                                                                                                                                                                                                    |
| Patient | Type of ICU admission                                     | No                                  | Already included as part of the computation of the SAPS-II score.                                                                                                                                                                                            |
| Patient | Primary ICU admission diagnosis                           | No                                  | Collinear with sepsis / septic shock as 20.4% patients were admitted for sepsis or septic shock                                                                                                                                                              |
| Patient | Time from ICU admission to HA-BSI                         | Yes                                 |                                                                                                                                                                                                                                                              |
| Patient | Temperature at HA-BSI (max) in class                      | No                                  | Already included as part of the computation of the SAPS-II score.                                                                                                                                                                                            |
| Patient | SOFA score without the cardiovascular component at HA-BSI | Yes                                 | The SOFA score cardiovascular component includes the use of dopamine, epi. or norepi. and as such is collinear with septic shock.<br>We have included in the multivariable analysis a SOFA score excluding the cardiovascular component to avoid this issue. |
| Patient | SOFA score at HA-BSI                                      | No                                  |                                                                                                                                                                                                                                                              |
| Patient | Ventilation status                                        | No                                  | Collinear with the SOFA score                                                                                                                                                                                                                                |
| Patient | Vasopressors (adrenaline or noradrenaline)                | No                                  | Collinear with sepsis / septic shock                                                                                                                                                                                                                         |
| Patient | ECMO (VA OR VV)                                           | No                                  | Size < 5%                                                                                                                                                                                                                                                    |
| Patient | Vasopressin                                               | Yes                                 | This variable is not included in the SOFA score or in sepsis / septic shock.                                                                                                                                                                                 |
| Patient | Septic shock in class                                     | Yes                                 |                                                                                                                                                                                                                                                              |
| Patient | DTR Gram-negative pathogen                                | Yes                                 |                                                                                                                                                                                                                                                              |
| Patient | Fungus                                                    | Yes                                 |                                                                                                                                                                                                                                                              |
| Patient | Source of HA-BSI                                          | Yes                                 |                                                                                                                                                                                                                                                              |
| Patient | Source control                                            | Yes                                 |                                                                                                                                                                                                                                                              |
| Patient | Time to adequate antimicrobial therapy                    | Yes                                 |                                                                                                                                                                                                                                                              |

eTable 5 Competing-risks frailty model and comparison with hierarchical logistic model

|                                                               |                                                | Hierarchical logistic mixed model | Competing-risks frailty model (Fine & Gray) |
|---------------------------------------------------------------|------------------------------------------------|-----------------------------------|---------------------------------------------|
| Variable                                                      | items                                          | OR [CI 95%]                       | sHR [CI 95%]                                |
| National income level                                         | High-Income                                    | 1                                 | 1                                           |
|                                                               | Upper-middle-income                            | 0.83 [0.47;1.48]                  | 0.86 [0.65;1.14]                            |
|                                                               | Low & Lower-middle-income                      | 1.14 [0.71;1.83]                  | 1.10 [0.91;1.34]                            |
| Type of ICU                                                   | Mixed (medical-surgical)                       | 1                                 | 1                                           |
|                                                               | Medical                                        | 1.31 [0.88;1.95]                  | 1.14 [0.96;1.36]                            |
|                                                               | Surgical                                       | 1.02 [0.59;1.75]                  | 0.83 [0.61;1.11]                            |
| Clinical pharmacists are consulted                            | When required, 24/7                            | 1                                 | 1                                           |
|                                                               | During business hours or part of the ICU staff | 1.19 [0.84;1.68]                  | 1.08 [0.89;1.32]                            |
|                                                               | Never or sporadically                          | 1.69 [1.17;2.43]                  | 1.31 [1.08;1.58]                            |
| TDM of aminoglycosides is available                           | Everyday                                       | 1                                 | 1                                           |
|                                                               | At least once a week                           | 1.31 [0.69;2.5]                   | 1.23 [0.89;1.70]                            |
|                                                               | Not available                                  | 1.41 [0.83;2.39]                  | 1.37 [1.07;1.75]                            |
| TDM of vancomycin is available                                | Everyday                                       | 1                                 | 1                                           |
|                                                               | At least once a week                           | 0.66 [0.38;1.17]                  | 0.87 [0.65;1.16]                            |
|                                                               | Not available                                  | 0.99 [0.58;1.71]                  | 0.81 [0.63;1.05]                            |
| Number of Ventilator equivalent beds in the ICU $\geq 15$     |                                                | 0.88 [0.68;1.16]                  | 0.85 [0.74;0.98]                            |
| Charlson comorbidity index                                    | 0                                              | 1                                 | 1                                           |
|                                                               | 1 to 2                                         | 1.32 [1.03;1.69]                  | 1.26 [1.05;1.51]                            |
|                                                               | >2                                             | 1.26 [0.97;1.65]                  | 1.23 [1.01;1.49]                            |
| Immunosuppression: Steroids                                   |                                                | 1.44 [0.95;2.2]                   | 1.14 [0.88;1.48]                            |
| Chemotherapy / radiotherapy within 6 months                   |                                                | 1.23 [0.86;1.76]                  | 1.16 [0.91;1.47]                            |
| SAPS II on ICU admission without age-related points           | < 26                                           | 1                                 | 1                                           |
|                                                               | [26-35]                                        | 0.79 [0.6;1.05]                   | 0.79 [0.65;0.96]                            |
|                                                               | [36-47]                                        | 0.83 [0.62;1.11]                  | 0.70 [0.57;0.86]                            |
|                                                               | $\geq 48$                                      | 0.95 [0.7;1.28]                   | 0.79 [0.64;0.97]                            |
| Age (years)                                                   | <52                                            | 1                                 | 1                                           |
|                                                               | [52-64]                                        | 1.47 [1.11;1.95]                  | 1.22 [0.99;1.49]                            |
|                                                               | [65-73]                                        | 1.47 [1.09;1.97]                  | 1.23 [1.00;1.52]                            |
|                                                               | $\geq 74$                                      | 2.5 [1.86;3.36]                   | 1.51 [1.22;1.85]                            |
| Time from ICU admission to HA-BSI                             | Late ICU-acquired (>7 days)                    | 1                                 | 1                                           |
|                                                               | Early ICU-acquired ( $\leq 7$ days)            | 1.1 [0.88;1.38]                   | 1.16 [1.00;1.36]                            |
|                                                               | Acquired prior to ICU admission                | 0.74 [0.56;0.98]                  | 0.97 [0.80;1.18]                            |
| SOFA score (Excluding the cardiovascular component) at HA-BSI |                                                | 1.2 [1.16;1.24]                   | 1.13 [1.10;1.16]                            |
| Vasopressin at HA-BSI                                         |                                                | 1.46 [0.89;2.4]                   | 1.13 [0.85;1.50]                            |
| Septic shock at HA-BSI                                        | No sepsis or sepsis (no septic shock)          | 1                                 | 1                                           |
|                                                               | Septic shock at HA-BSI (no steroids)           | 1.59 [1.22;2.06]                  | 1.52 [1.27;1.80]                            |
|                                                               | Septic shock at HA-BSI (received steroids)     | 2.26 [1.67;3.05]                  | 1.83 [1.52;2.19]                            |
| DTR Gram-negative bacteria                                    |                                                | 1.48 [1.1;1.99]                   | 1.29 [1.08;1.55]                            |
| Fungus                                                        |                                                | 1.14 [0.81;1.6]                   | 0.96 [0.76;1.22]                            |
| Most likely source of infection                               | Intravascular catheter                         | 1                                 | 1                                           |
|                                                               | Intra-abdominal                                | 0.95 [0.68;1.33]                  | 0.94 [0.75;1.18]                            |
|                                                               | Other                                          | 0.88 [0.58;1.33]                  | 0.94 [0.71;1.24]                            |
|                                                               | Primary                                        | 1 [0.7;1.43]                      | 1.02 [0.79;1.30]                            |
|                                                               | Respiratory                                    | 1.18 [0.86;1.62]                  | 1.06 [0.86;1.31]                            |
|                                                               | Urinary                                        | 0.77 [0.49;1.2]                   | 0.92 [0.67;1.26]                            |
| Source control                                                | Not required                                   | 1                                 | 1                                           |
|                                                               | Required, achieved                             | 0.71 [0.54;0.92]                  | 0.67 [0.56;0.80]                            |
|                                                               | Required, but NOT achieved                     | 2.51 [1.74;3.63]                  | 1.74 [1.39;2.17]                            |
| Adequate antimicrobial therapy within 24h of HA-BSI           |                                                | 0.85 [0.69;1.04]                  | 0.98 [0.85;1.12]                            |

Legend: Initially planned the hierarchical logistic mixed model and comparison with a competing risk frailty model. The covariance parameters for the logistic model (3-level hierarchical logistic regression) are as follows: Country-Level 3 (estimate: 0.08314, Standard error (SE) 0.09173), Center-Level 2 (estimate 0.4104, SE 0.1037). The c-statistic for the primary model was 0.8279 (95% CI 0.8119; 0.8439), indicating good discrimination. Calibration was tested using a calibration belt as shown below. Income level categories were defined using the United Nations M49 standard. HA-BSI: Hospital-acquired bloodstream infection, SAPS II: Simplified Acute Physiology Score II, TDM: Therapeutic drug monitoring, SOFA: Sequential Organ Failure Assessment. Closed brackets [;] denote inclusive of the end of the range and open brackets ]; [ denote the exclusion of the end of the range.



| Variable level |        |         |
|----------------|--------|---------|
| Country        | Center | Patient |

## Variables

National income level (ref : High-income)  
 Upper-middle-income  
 Low & lower-middle-income

Type of ICU (ref: Mixed (medical-surgical))  
 Medical  
 Surgical

Clinical pharmacists are consulted (ref: When required, 24/7)  
 During business hours or as part of the permanent staff of the ICU  
 Never or sporadically

TDM of aminoglycosides is available (ref: Everyday)  
 At least once a week  
 Not available

TDM of vancomycin is available (ref: Everyday)  
 At least once a week  
 Not available

Number of Ventilator equivalent beds in the ICU >=15

Charlson comorbidity index (ref: 0)  
 1 to 2  
 >2

Immunosuppression : Steroids

Chemotherapy / radiotherapy within 6 months

SAPS II on ICU admission without age-related points (ref: <26)  
 [26-35]  
 [36-47]  
 >=48

Age (years) (ref: <52)  
 [52-64]  
 [65-73]  
 >=74

Delay to ICU admission to HA-BSI (ref: Late ICU-acquired (>7 days))  
 Early ICU-acquired (<=7 days)  
 Acquired prior to ICU admission

SOFA score (Excluding the cardiovascular component) at HA-BSI

Vasopressin at HA-BSI

Septic shock at HA-BSI (ref: No sepsis or sepsis (no septic shock))  
 Septic shock at HA-BSI (no steroids)  
 Septic shock at HA-BSI (steroids administered)

DTR Gram-negative bacteria

Fungus

Source of HA-BSI (ref: Intravascular catheter)  
 Intra-abdominal  
 Other  
 Primary  
 Respiratory  
 Urinary

Source control (ref: Not required)  
 Required, achieved  
 Required, but NOT achieved

Adequate antimicrobial therapy within first 24 hours

## Multivariable mixed logistic regression on day-28 mortality with random country and center effects

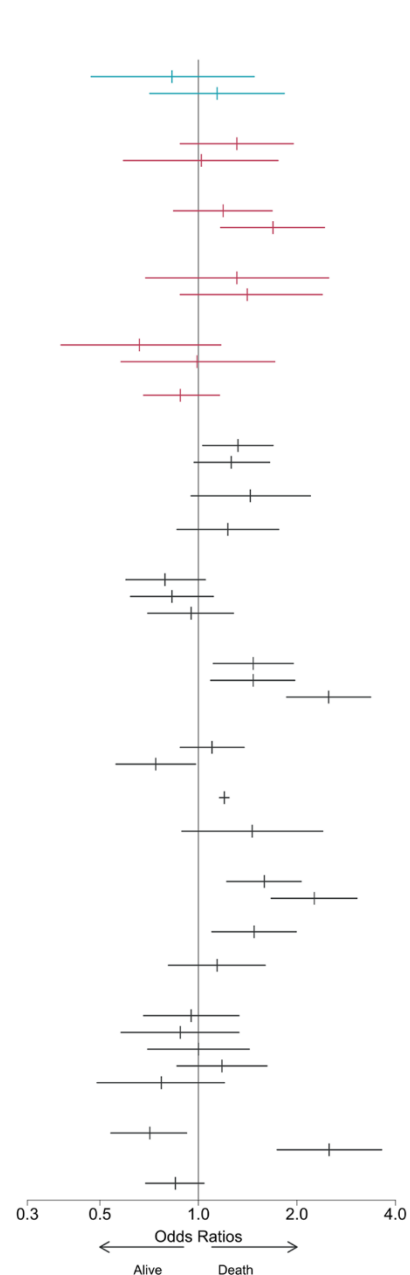

## OR [95% CI]

0.83 [0.47 ; 1.48]  
 1.14 [0.71 ; 1.83]  
 1.31 [0.88 ; 1.95]  
 1.02 [0.59 ; 1.75]  
 1.19 [0.84 ; 1.68]  
 1.69 [1.17 ; 2.43]  
 1.31 [0.69 ; 2.5]  
 1.41 [0.83 ; 2.39]  
 0.66 [0.38 ; 1.17]  
 0.99 [0.58 ; 1.71]  
 0.88 [0.68 ; 1.16]  
 1.32 [1.03 ; 1.69]  
 1.26 [0.97 ; 1.65]  
 1.44 [0.95 ; 2.2]  
 1.23 [0.86 ; 1.76]  
 0.79 [0.6 ; 1.05]  
 0.83 [0.62 ; 1.11]  
 0.95 [0.7 ; 1.28]  
 1.47 [1.11 ; 1.95]  
 1.47 [1.09 ; 1.97]  
 2.5 [1.86 ; 3.36]  
 1.1 [0.88 ; 1.38]  
 0.74 [0.56 ; 0.98]  
 1.2 [1.16 ; 1.24]  
 1.46 [0.89 ; 2.4]  
 1.59 [1.22 ; 2.06]  
 2.26 [1.67 ; 3.05]  
 1.48 [1.1 ; 1.99]  
 1.14 [0.81 ; 1.6]  
 0.95 [0.68 ; 1.33]  
 0.88 [0.58 ; 1.33]  
 1 [0.7 ; 1.43]  
 1.18 [0.86 ; 1.62]  
 0.77 [0.49 ; 1.2]  
 0.71 [0.54 ; 0.92]  
 2.51 [1.74 ; 3.63]  
 0.85 [0.69 ; 1.04]

## Multivariable subhazard frailty model on day-28 mortality with a random center effect

## sHR [95% CI]

0.86 [0.65 ; 1.14]  
 1.10 [0.91 ; 1.34]  
 1.14 [0.96 ; 1.36]  
 0.83 [0.61 ; 1.11]  
 1.08 [0.89 ; 1.32]  
 1.31 [1.08 ; 1.58]  
 1.23 [0.89 ; 1.70]  
 1.37 [1.07 ; 1.75]  
 0.87 [0.65 ; 1.16]  
 0.81 [0.63 ; 1.05]  
 0.85 [0.74 ; 0.98]  
 1.26 [1.05 ; 1.51]  
 1.23 [1.01 ; 1.49]  
 1.14 [0.88 ; 1.48]  
 1.16 [0.91 ; 1.47]  
 0.79 [0.65 ; 0.96]  
 0.70 [0.57 ; 0.86]  
 0.79 [0.64 ; 0.97]  
 1.22 [0.99 ; 1.49]  
 1.23 [1.00 ; 1.52]  
 1.51 [1.22 ; 1.85]  
 1.16 [1.00 ; 1.36]  
 0.97 [0.80 ; 1.18]  
 1.13 [1.10 ; 1.16]  
 1.13 [0.85 ; 1.50]  
 1.52 [1.27 ; 1.80]  
 1.83 [1.52 ; 2.19]  
 1.29 [1.08 ; 1.55]  
 0.96 [0.76 ; 1.22]  
 0.94 [0.75 ; 1.18]  
 0.94 [0.71 ; 1.24]  
 1.02 [0.79 ; 1.30]  
 1.06 [0.86 ; 1.31]  
 0.92 [0.67 ; 1.26]  
 0.67 [0.56 ; 0.80]  
 1.74 [1.39 ; 2.17]  
 0.98 [0.85 ; 1.12]

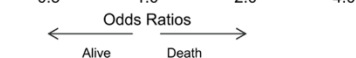

eFigure 4: Calibration belt for the hierarchical logistic model.

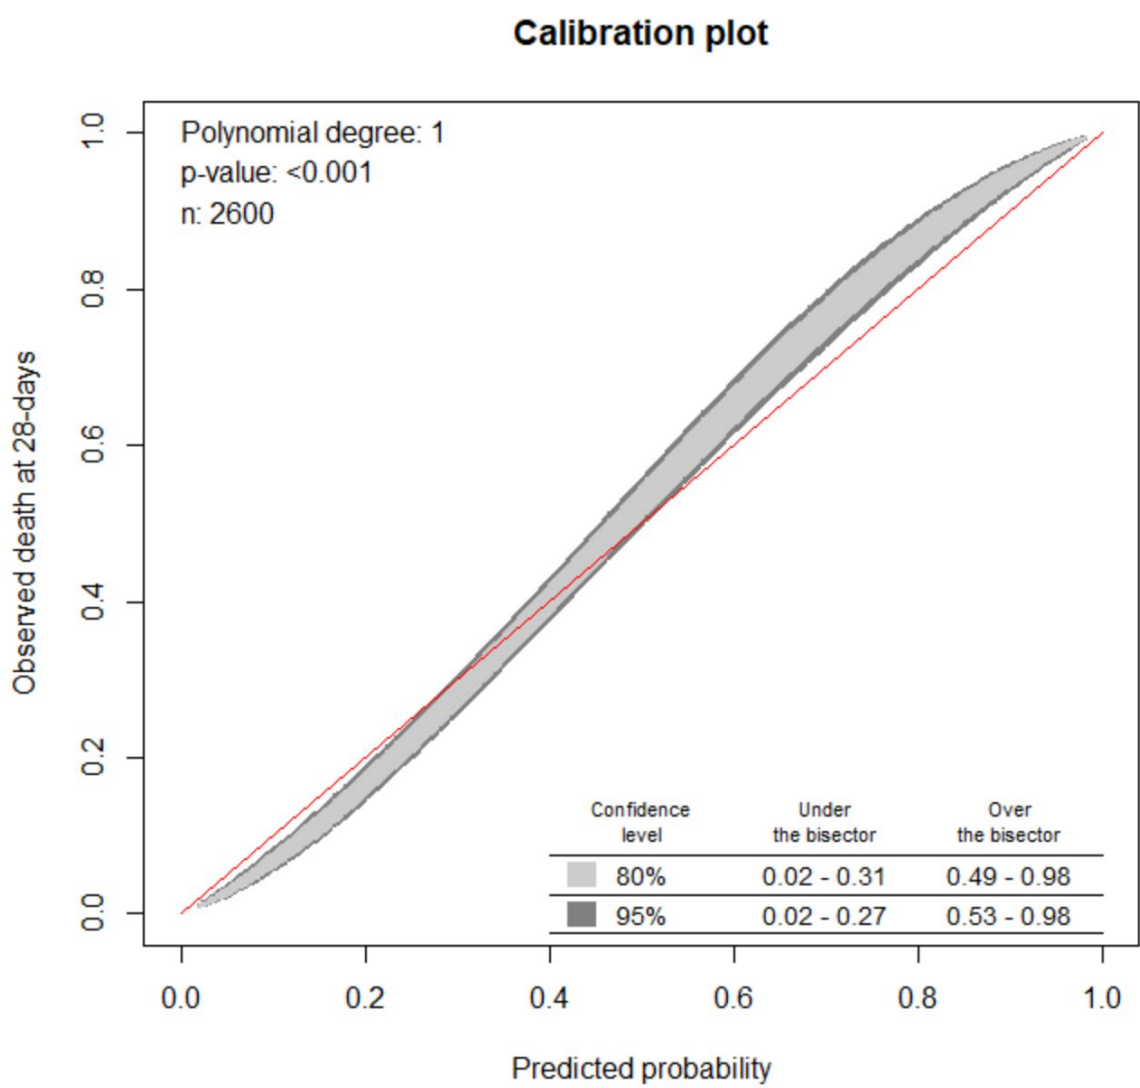

Legend: Calibration belt, following the recommendations by Nattino et al. (2017), showing poor calibration. Given that our primary goal was to describe clinical features of HA-BSI patients and associations with mortality, we chose to fully pre-specify clinically relevant variables to be introduced in the model and have not attempted to improve model calibration through addition or deletion of variables, techniques of handling variables or other model specifications. Our preference was to present clinically relevant variables and their associations with mortality that physicians may use at the bedside.

eTable 6 Sensitivity analysis: Hierarchical logistic mixed model with random effects for country and ICU, excluding the 276 patients with a COVID-19 diagnosis.

Legend:

|                                                               |                                                | Hierarchical logistic mixed model |
|---------------------------------------------------------------|------------------------------------------------|-----------------------------------|
| Variable                                                      | items                                          | OR [CI 95%]                       |
| National income level                                         | High-Income                                    | 1                                 |
|                                                               | Upper-middle-income                            | 0.9 [0.5;1.61]                    |
|                                                               | Low & Lower-middle-income                      | 1.18 [0.73;1.91]                  |
| Type of ICU                                                   | Mixed (medical-surgical)                       | 1                                 |
|                                                               | Medical                                        | 1.38 [0.92;2.07]                  |
|                                                               | Surgical                                       | 1.12 [0.65;1.91]                  |
| Clinical pharmacists are consulted                            | When required, 24/7                            | 1                                 |
|                                                               | During business hours or part of the ICU staff | 1.14 [0.81;1.62]                  |
|                                                               | Never or sporadically                          | 1.64 [1.13;2.38]                  |
| TDM of aminoglycosides is available                           | Everyday                                       | 1                                 |
|                                                               | At least once a week                           | 1.41 [0.75;2.69]                  |
|                                                               | Not available                                  | 1.52 [0.89;2.59]                  |
| TDM of vancomycin is available                                | Everyday                                       | 1                                 |
|                                                               | At least once a week                           | 0.67 [0.38;1.17]                  |
|                                                               | Not available                                  | 0.89 [0.52;1.52]                  |
| Number of Ventilator equivalent beds in the ICU $\geq 15$     |                                                | 0.86 [0.65;1.14]                  |
| Charlson comorbidity index                                    | 0                                              | 1                                 |
|                                                               | 1 to 2                                         | 1.29 [0.99;1.68]                  |
|                                                               | >2                                             | 1.19 [0.9;1.58]                   |
| Immunosuppression: Steroids                                   |                                                | 1.52 [0.98;2.35]                  |
| Chemotherapy / radiotherapy within 6 months                   |                                                | 1.29 [0.9;1.84]                   |
| SAPS II on ICU admission without age-related points           | < 26                                           | 1                                 |
|                                                               | [26-35]                                        | 0.71 [0.52;0.98]                  |
|                                                               | [36-47]                                        | 0.84 [0.61;1.16]                  |
|                                                               | $\geq 48$                                      | 0.96 [0.69;1.34]                  |
| Age (years)                                                   | <52                                            | 1                                 |
|                                                               | [52-64]                                        | 1.54 [1.14;2.08]                  |
|                                                               | [65-73]                                        | 1.43 [1.04;1.95]                  |
|                                                               | $\geq 74$                                      | 2.6 [1.91;3.55]                   |
| Time from ICU admission to HA-BSI                             | Late ICU-acquired (>7 days)                    | 1                                 |
|                                                               | Early ICU-acquired ( $\leq 7$ days)            | 1.13 [0.89;1.45]                  |
|                                                               | Acquired prior to ICU admission                | 0.81 [0.6;1.08]                   |
| SOFA score (Excluding the cardiovascular component) at HA-BSI |                                                | 1.23 [1.19;1.28]                  |
| Vasopressin at HA-BSI                                         |                                                | 1.56 [0.95;2.58]                  |
| Septic shock at HA-BSI                                        | No sepsis or sepsis (no septic shock)          | 1                                 |
|                                                               | Septic shock at HA-BSI (no steroids)           | 1.52 [1.15;2]                     |
|                                                               | Septic shock at HA-BSI (received steroids)     | 2.08 [1.51;2.87]                  |
| DTR Gram-negative bacteria                                    |                                                | 1.38 [1.01;1.89]                  |
| Fungus                                                        |                                                | 1.4 [1.01;1.92]                   |
| Most likely source of infection                               | Intravascular catheter                         | 1                                 |
|                                                               | Intra-abdominal                                | 1.06 [0.75;1.5]                   |
|                                                               | Other                                          | 0.99 [0.65;1.52]                  |
|                                                               | Primary                                        | 1 [0.68;1.48]                     |
|                                                               | Respiratory                                    | 1.18 [0.83;1.66]                  |
|                                                               | Urinary                                        | 0.87 [0.55;1.39]                  |
| Source control                                                | Not required                                   | 1                                 |
|                                                               | Required, achieved                             | 0.75 [0.57;0.99]                  |
|                                                               | Required, but NOT achieved                     | 2.59 [1.77;3.8]                   |
| Adequate antimicrobial therapy within 24h of HA-BSI           |                                                | 0.84 [0.68;1.04]                  |

Sensitivity analysis conducted on 2324 patients after exclusion of the 276 patients with a COVID-19 diagnosis, Income level categories were defined using the United Nations M49 standard. DTR: difficult-to-treat resistance, HA-BSI: Hospital-acquired Bloodstream Infection, ICU: intensive care unit, SAPS II: Simplified Acute Physiology Score II, SOFA: Sequential Organ Failure Assessment, TDM: Therapeutic drug monitoring. Closed brackets [;] denote inclusive of the end of the range and open brackets ]; [ denote the exclusion of the end of the range.

eTable 7 Sensitivity analysis: Hierarchical logistic mixed model with random effects for country and ICU, investigating carbapenem resistance instead of difficult to treat resistance.

|                                                               |                                                | Hierarchical logistic mixed model |
|---------------------------------------------------------------|------------------------------------------------|-----------------------------------|
| Variable                                                      | items                                          | OR [CI 95%]                       |
| National income level                                         | High-Income                                    | 1                                 |
|                                                               | Upper-middle-income                            | 0.83 [0.46;1.48]                  |
|                                                               | Low & Lower-middle-income                      | 1.14 [0.71;1.84]                  |
| Type of ICU                                                   | Mixed (medical-surgical)                       | 1                                 |
|                                                               | Medical                                        | 1.3 [0.87;1.94]                   |
|                                                               | Surgical                                       | 1.02 [0.59;1.75]                  |
| Clinical pharmacists are consulted                            | When required, 24/7                            | 1                                 |
|                                                               | During business hours or part of the ICU staff | 1.19 [0.84;1.68]                  |
|                                                               | Never or sporadically                          | 1.68 [1.16;2.42]                  |
| TDM of aminoglycosides is available                           | Everyday                                       | 1                                 |
|                                                               | At least once a week                           | 1.31 [0.69;2.49]                  |
|                                                               | Not available                                  | 1.39 [0.82;2.38]                  |
| TDM of vancomycin is available                                | Everyday                                       | 1                                 |
|                                                               | At least once a week                           | 0.67 [0.38;1.18]                  |
|                                                               | Not available                                  | 1 [0.58;1.72]                     |
| Number of Ventilator equivalent beds in the ICU ≥15           |                                                | 0.88 [0.67;1.16]                  |
| Charlson comorbidity index                                    | 0                                              | 1                                 |
|                                                               | 1 to 2                                         | 1.32 [1.03;1.69]                  |
|                                                               | >2                                             | 1.27 [0.97;1.65]                  |
| Immunosuppression: Steroids                                   |                                                | 1.41 [0.93;2.16]                  |
| Chemotherapy / radiotherapy within 6 months                   |                                                | 1.24 [0.86;1.77]                  |
| SAPS II on ICU admission without age-related points           | < 26                                           | 1                                 |
|                                                               | [26-35]                                        | 0.79 [0.6;1.05]                   |
|                                                               | [36-47]                                        | 0.84 [0.62;1.12]                  |
|                                                               | ≥48                                            | 0.95 [0.7;1.29]                   |
| Age (years)                                                   | <52                                            | 1                                 |
|                                                               | [52-64]                                        | 1.48 [1.11;1.96]                  |
|                                                               | [65-73]                                        | 1.47 [1.1;1.98]                   |
|                                                               | ≥74                                            | 2.52 [1.88;3.38]                  |
| Time from ICU admission to HA-BSI                             | Late ICU-acquired (>7 days)                    | 1                                 |
|                                                               | Early ICU-acquired (≤7 days)                   | 1.1 [0.88;1.38]                   |
|                                                               | Acquired prior to ICU admission                | 0.74 [0.56;0.98]                  |
| SOFA score (Excluding the cardiovascular component) at HA-BSI |                                                | 1.23 [1.18;1.27]                  |
| Vasopressin at HA-BSI                                         |                                                | 1.49 [0.91;2.43]                  |
| Septic shock at HA-BSI                                        | No sepsis or sepsis (no septic shock)          | 1                                 |
|                                                               | Septic shock at HA-BSI (no steroids)           | 1.58 [1.22;2.05]                  |
|                                                               | Septic shock at HA-BSI (received steroids)     | 2.26 [1.67;3.06]                  |
| Carbapenem resistant enterobacterales                         |                                                | 1.31 [1.02;1.68]                  |
| Fungus                                                        |                                                | 1.15 [0.81;1.62]                  |
| Most likely source of infection                               | Intravascular catheter                         | 1                                 |
|                                                               | Intra-abdominal                                | 0.95 [0.68;1.33]                  |
|                                                               | Other                                          | 0.88 [0.58;1.33]                  |
|                                                               | Primary                                        | 1 [0.7;1.43]                      |
|                                                               | Respiratory                                    | 1.18 [0.86;1.62]                  |
|                                                               | Urinary                                        | 0.77 [0.49;1.2]                   |
| Source control                                                | Not required                                   | 1                                 |
|                                                               | Required, achieved                             | 0.71 [0.55;0.92]                  |
|                                                               | Required, but NOT achieved                     | 2.48 [1.72;3.59]                  |
| Adequate antimicrobial therapy within 24h of HA-BSI           |                                                | 0.85 [0.7;1.04]                   |

Legend: Sensitivity analysis computed by imputing carbapenem resistance in Gram-negative pathogens in place of DTR. Income level categories were defined using the United Nations M49 standard. DTR: difficult-to-treat resistance, HA-BSI: Hospital-acquired Bloodstream Infection, ICU: intensive care unit, SAPS II: Simplified Acute Physiology Score II, SOFA: Sequential Organ Failure Assessment, TDM: Therapeutic drug monitoring. Closed brackets [;] denote inclusive of the end of the range and open brackets ]; [ denote the exclusion of the end of the range.

The Eurobact 2 study group: National coordinators, scientific committee, and participating intensive care units.

## East Asia and Pacific

### Australia

*National Coordinator:* A/Prof. Alexis Tabah

*Scientific Committee:* Prof. Jeffrey Lipman

*Participating ICUs:* Redcliffe Hospital, ICU: A/Prof. Alexis Tabah, Dr Hamish Pollock, Dr Ben Margetts. Alfred Hospital, Department of Intensive Care and Hyperbaric Medicine: Prof Andrew Udy, Ms Meredith Young. Ipswich Hospital, Intensive Care Unit: Dr Neeraj Bhadange, Mr Steven Tyler. Mater Hospital, And Mater Research Institute – The University of Queensland, Mater Misericordiae Limited, The Department of Intensive Care: Dr Anne Ledtischke, Miss Mackenzie Finnis. Mater Private Hospital, And Mater Research Institute – The University of Queensland, Mater Misericordiae, The Department of Intensive Care: Dr Anne Ledtischke, Miss Mackenzie Finnis. Bankstown-Lidcombe Hospital, Intensive Care Unit: Dr Jyotsna Dwivedi, Dr Manoj Saxena. Lyell Mcewin Hospital, Lyell Mcewin Hospital Intensive Care Unit: Dr Vishwanath Biradar, Mrs Natalie Soar. Cabrini Hospital, Intensive Care: A/Prof Vineet Sarode, A/Prof David Brewster. St John Of God Murdoch Hospital, Intensive Care Unit: A/Prof Adrian Regli, Dr Elizabeth Weeda. Royal Brisbane and Women S Hospital, Intensive Care Services: Dr Samiul Ahmed, Ms Cheryl Fourie, Prof. Kevin Laupland. The Prince Charles Hospital, Adult Intensive Care Services: Dr Mahesh Ramanan. Princess Alexandra Hospital, Intensive Care: Dr James Walsham, Mr Jason Meyer. Fiona Stanley Hospital, Intensive Care Unit: Dr Edward Litton, Ms Anna Maria Palermo, Mr Timothy Yap, Mr Ege Eroglu. Rockhampton Hospital, Intensive Care Unit: Dr Antony George Attokaran, Dr C'havala Jaramillo.

### Brunei

*National Coordinator:* Dr. Khalid Mk Nafees

*Participating ICUs:* Ripas Hospital, Icu 3: Dr Khalid Mahmood Khan Nafees. Raja Isteri Pengiran Anak Saleha Hospital, Icu1: Dr Nurhikmahtul Aqilah Haji Abd Rashid, Dr Haji Adi Muhamad Ibnu Walid. Gleneagles Jpmc, Icu: Dr Tomas Mon, Dr P. Dhakshina Moorthi. Suri Seri Begawan Hospital, Intensive Care Unit: Dr Shah Sudhirschandra, Dr Dhadappa Damodar Sridharan.

### China

*National Coordinator:* Dr. Qiu Haibo and Dr. Jianfeng Xie

*Participating ICUs:* Zhongda Hospital, Southeast University, Department of Critical Care Medicine: Dr Qiu Haibo, Dr Xie Jianfeng. Yijishan Hospital, First Affiliated Hospital of Wannan Medical College, Department of Critical Care Medicine: Dr Lu Wei-Hua, Dr Wang Zhen. First Affiliate Hospital of Kunming Medical University, Micu/Eicu: Prof Chuanyun Qian, Dr Jili Luo. Qilu Hospital of Shandong University, Department of Critical Care Medicine: Dr Xiaomei Chen, Dr Hao Wang. Hebei Petrochina Central Hospital, Intensive Care Unit: Dr Peng Zhao, Dr Juan Zhao. Hangzhou Second Hospital, Affiliated Hospital of Hangzhou Normal University: Prof Qiu Wusi, Miss Chen Mingmin. Tianjin Third Central Hospital, Department of Critical Care Medicine: Dr Lei Xu, Dr Chengfen Yin. Shanghai General Hospital, Shanghai Jiao Tong University School of Medicine, Department Of Critical Care Medicine: Dr Ruilan Wang, Dr Jinfeng Wang. The Second Hospital of Jilin University, Department Of Critical Care: Dr Yongjie Yin, Dr Min Zhang. Taizhou People S Hospital, Intensive Care Unit: Dr Jilu Ye, Dr Chungfang Hu. The First Affiliated Hospital of Nanjing Medical University, Department Of Geriatrics Intensive Care Unit: Dr Suming Zhou, Dr Min Huang. Zhejiang Hospital, Intensive Care Unit: Prof Jing Yan, Dr Yan Wang. Henan Provincial People S Hospital, Department of Critical Care Medicine: Dr Bingyu Qin, Dr Ling Ye. Qingdao Municipal Hospital, Intensive Care Unit: Dr Xie Weifeng. The Second Hospital of Lanzhou University, Department Of Critical Care Medicine: Dr Li Peije, Dr Nan Geng.

### Hong Kong

*National Coordinator:* Dr. Lowell Ling

*Participating ICUs:* The Chinese University of Hong Kong, Prince of Wales Hospital, Department Of Anaesthesia And Intensive Care: Dr Lowell Ling.

## Japan

*National Coordinator:* Dr. Yoshiro Hayashi

*Participating ICUs:* Kameda Medical Center, Department of Intensive Care Medicine: Dr Yoshiro Hayashi, Dr Toshiyuki Karumai. University Hospital Kyoto Prefectural University of Medicine, Intensive Care Unit: Dr Masaki Yamasaki, Dr Satoru Hashimoto. Hiroshima University Hospital, ICU: Dr Koji Hosokawa. Yokosuka General Hospital Uwamachi, Critical Care Medicine: Dr Jun Makino. Tokyo Metropolitan Tama Medical Center, Emergency and Critical Care Center: Dr Takeo Matsuyoshi. Kurashiki Central Hospital, Emergency Intensive Care Unit: Dr Akira Kuriyama. Tokyo Medical and Dental University, Department of Intensive Care Medicine: Dr Hidenobu Shigemitsu, Dr Yuka Mishima, Dr Michio Nagashima. St. Marianna University School of Medicine Hospital, Mixed ICU: Dr Hideki Yoshida, Prof. Shigeki Fujitani. Osaka City General Hospital, Emergency and Critical Care Medical Hospital: Dr Koichiro Omori, Dr Hiroshi Rinka. St. Marianna University School of Medicine, Yokohama City Seibu Hospital, Mixed ICU: Dr Hiroki Saito, Dr Kaori Atobe. Yokohama City University Hospital, Infection Prevention and Control Department: Dr Hideaki Kato. Yokohama City University Hospital, Intensive Care Department: Dr Shunsuke Takaki.

## Malaysia

*National Coordinator:* Dr. Helmi Sulaiman

*Participating ICUs:* University Malaya Medical Centre, Department of Anaesthesiology and Intensive Care: Dr M. Shahnaz Hasan, Dr Muhamad Fadhil Hadi Jamaluddin. Hospital Tengku Ampuan Rahimah, Anaesthesia and Intensive Care: Dr Lee See Pheng, Dr Sheshendrasurian Visvalingam. Hospital Sarikei, Anaesthesiology & Intensive Care Unit: Dr Mun Thing Liew, Dr Siong Ling Danny Wong. Queen Elizabeth 1 Hospital, Department of Anaesthesiology and Intensive Care: Dr Kean Khang Fong, Dr Hamizah Bt Abdul Rahman. Hospital Serdang, Cardiothoracic and Perfusion Unit: Dr Zuraini Md Noor, Dr Lee Kok Tong. Hospital Tuanku Fauziah, Intensive Care Unit: Dr Abd. Hamid Azman. School Of Medical Sciences Universiti Sains Malaysia, Department of Anaesthesiology and Intensive Care: Dr Mohd Zulfakar Mazlan. Hospital Universiti Sains Malaysia, Department of Anaesthesiology and Intensive Care: Dr Saedah Ali.

## Philippines

*National Coordinator:* Dr. Aaron Mark Hernandez

*Participating ICUs:* The Medical City Ortigas, Intensive Care Unit: Dr Anton Abello.

## Republic Of Korea

*National Coordinator:* Dr Kyeongman Jeon

*Participating ICUs:* Samsung Medical Center, Medical Icu: Dr Kyeongman Jeon. Seoul National University Hospital, Medical Icu: Dr Sang-Min Lee. Hallym University Sacred Heart Hospital, Micu: Dr Sunghoon Park. Micu, Chonbuk National University Hospital: Prof Dr Seung Yong Park. Seoul National University Bundang Hospital, Medical Icu: Dr Sung Yoon Lim.

## Singapore

*National Coordinator:* A/Prof Andrea Lay Hoon Kwa, Dr Qing Yuan Goh

*Participating ICUs:* Singapore General Hospital, Surgical Intensive Care Unit: Dr Qing Yuan Goh, A/Prof Shin Yi Ng. Singapore General Hospital, Neurosurgical Intensive Care Unit: Dr Sui An Lie, A/Prof Andrea Lay Hoon Kwa. Singapore General Hospital, Medical Intensive Care Unit: Dr Ken Junyang Goh. National University Hospital System Medical Intensive Care Unit: Dr Andrew Yunkai Li. Tan Tock Seng Hospital, Surgical Intensive Care Unit, Neurological Intensive Care Unit: Adj Asst Prof Caroline Yu Ming Ong, Dr Jia Yan Lim. Changi General Hospital, Medical Intensive Care Unit: Dr Jessica Lishan Quah, Dr Kangqi Ng. Changi General Hospital, Surgical Intensive Care Unit: Dr Louis Xiang Long Ng.

## Taiwan

*National Coordinator:* Dr. Tony Yu-Chang Yeh

*Participating ICUs:* National Taiwan University Hospital, Sicu: Dr Yu Chang Yeh, Dr Nai-Kuan Chou. National Cheng Kung University Hospital, Division of Critical Care Medicine, Department of Internal Medicine: Dr Cong-Tat Cia. Mackay Memorial Hospital, Department of Critical Care Medicine: Dr Ting-Yu Hu, Dr Li-Kuo Kuo. National Taiwan University Hospital, Department of Internal Medicine, Micu: Dr Shih-Chi Ku.

## Thailand

*National Coordinator:* Prof (Associate) Phunsup Wongsurakiat

*Participating ICUs:* Siriraj Hospital, Mahidol University, Critical Respiratory Care Unit, Department of Medicine: Prof (Associate) Phunsup Wongsurakiat. Vajira Hospital, Department of Internal Medicine: Dr Yutthana Apichatbutr, Dr Supattra Chiewroongroj.

## Middle East and North Africa

### Dubai

*National Coordinator:* Dr. Adel Alsisi

*Participating ICUs:* Dubai Hospital, Icu Department: Dr Rashid Nadeem, Dr Ashraf El Houfi.

### Egypt

*National Coordinator:* Dr. Adel Alsisi

*Participating ICUs:* Cairo University Hospital (Qasr Al Ainy), Critical Care Department: Dr Adel Alsisi, Dr Amr Elhadidy, Dr Mina Barsoum. Medical Research Institute, Alexandria University, Biomedical Informatics and Medical Statistics (Icu): Dr Nermin Osman. Tanta University Hospital, Anaesthesia and Critical Care Department: Dr Tarek Mostafa. Tanta University Faculty of Medicine, Emergency Medicine and Traumatology Department: Dr Mohamed Elbahnasawy. Tanta University Emergency Hospital, Emergency, And Traumatology Department Critical Care Unit: Dr Ahmed Saber. Nasr City Health Insurance Hospital, Medical Icu: Dr Amer Aldhalia. Wingat Royal Hospital, Wingat Icu: Dr Omar Elmandouh. Elsayhel Teaching Hospital, Icu: Dr Ahmed Elsayed. Ain Shams University Hospitals, Department of General Surgery: Dr Merihan A. Elbadawy, Dr Ahmed K. Awad. Alexandria Faculty of Medicine, Dialysis Intensive Care Unit: Miss Hanan M. Hemeed.

### Iran

*National Coordinator:* Prof. Farid Zand

*Participating ICUs:* Shiraz University of Medical Sciences, Anesthesiology and Critical Care Research Center: Prof Farid Zand, Dr Maryam Ouhadian. Ahvaz Jundishapur University of Medical Sciences, Air Pollution and Respiratory Diseases Research Center: Dr Seyed Hamid Borsi,, Dr Zahra Mehraban. Ahvaz Jundishapur University of Medical Sciences, Neurology Department: Dr Davood Kashipazha. Ahvaz Jundishapur University of Medical Sciences, Infectious and Tropical Diseases Research Center, Health Research Institute: Dr Fatemeh Ahmadi. Ahvaz Jundishapur University of Medical, Pain Research Center: Dr Mohsen Savaie, Dr Farhad Soltani, Dr Mahboobeh Rashidi, Dr Reza Baghbanian, Dr Fatemeh Javaherforoosh, Dr Fereshteh Amiri. Ahvaz Jundishapur University of Medical Sciences, Neurosurgery Department, Dr Arash Kiani. Ahvaz Jundishapur University of Medical Sciences, General Surgery Department, Dr Mohammad Amin Zargar. Tabriz University of Medical Sciences, Research Center for Integrative Medicine in Aging, Aging Research Institute: Prof Ata Mahmoodpoor. Jahrom University of Medical Sciences, Peimanieh Hospital : Dr Fatemeh Aalinezhad. Shiraz University of Medical Sciences, Shahid Rajaei Trauma Hospital : Dr Gholamreza Dabiri. Shiraz University of Medical Sciences, Trauma Research Center, Shahid Rajaei Hospital : Dr Golnar Sabetian, Dr Hakimeh Sarshad. Shiraz University of Medical Sciences, Anesthesiology and Critical Care Research Center: Dr Mansoor Masjedi, Dr Ramin Tajvidi. Zahedan University of Medical Sciences, Anesthesiology and Critical Care Department: Dr Seyed Mohammad Nasirodin (S.M.N.) Tabatabaei.

### Iraq

*Participating ICUs:* Ibn Zuhur Hospital, Icu: Dr Abdullah Khudhur Ahmed.

### Israel

*National Coordinator:* Prof. Pierre Singer

*Participating ICUs:* Rabin Medical Center Beilinson Hospital, General Intensive Care: Prof Pierre Singer, Dr Ilya Kagan, Dr Merav Rigler. Shaare Zedek Medical Center, Intensive Care Unit: Dr Daniel Belman, Dr Phillip Levin.

### Jordan

*Participating ICUs:* Abdali Hospital, Icu: Dr Belal Harara, Dr Adei Diab.

## Lebanon

*National Coordinator:* Dr Fayez Abillama

*Participating ICUs:* Lebanese American University Medical Center Rizk Hospital, Intensive Care: Dr Fayez Abilama, Dr Rebecca Ibrahim, Dr Aya Fares.

## Libya

*National Coordinator:* Dr. Muhammed Elhadi

*Participating ICUs:* Aljalla Benghazi Center, Micu: Dr Ahmad Buimsaedah. Almokhtar Clinic, Intensive Care Unit: Dr Marwa Gamra. Althawra Central Hospital, Intensive Care Unit: Dr Ahmed Aqeelah. Brega General Hospital Bgh Libya, Icu: Dr Almajdoub Ali Mohammed Ali, Dr Ahmed Gaber Sadik Homaidan. National Heart Institute, Micu: Dr Bushray Almiqlash, Dr Hala Bilkhayr. Tobruk Medical Centre, Medical Icu: Dr Ahmad Bouhuwaish, Dr Ahmed Sa Taher. Tripoli Central Hospital, Icu: Dr Eman Abdulwahed, Dr Fathi A Abousnina, Dr Aisha Khaled Hdada. Tripoli Central Hospital, Unit C: Dr Rania Jobran. Zliten Medical Center, Icu of Zliten Medical Center: Dr Hayat Ben Hasan, Dr Rabab Shaban Ben Hasan.

## Morocco

*National Coordinator:* Prof. Khalid Abidi

*Participating ICUs:* Avicenne Military Hospital, Icu: Dr Issam Serghini, Pr Rachid Seddiki. CHU Hassan II Fès, Intensive Care Unit A4: Dr Brahim Boukatta, Dr Nabil Kanjaa. Hospital Of Specialties, Critical Care Unit of Neurology and Neurosurgery: Prof Doumiri Mouhssine, Prof Maazouzi Ahmed Wajdi. Ibn Sina University Hospital, faculty of Medicine and Pharmacy, Mohammed V University in Rabat, Medical Icu: Pr Tarek Dendane, Pr Amine Ali Zeggwagh. Mohammed VI University Hospital of Oujda, Faculty Of Medicine and Pharmacy Oujda, Mohammed Premier University, Anesthesia and Resuscitation Department: Prof Brahim Housni, Dr Oujidi Younes. Mohammed VI University Hospital, Medical Icu, Marrakech: Prof Abdelhamid Hachimi. National Institute of Oncology of Rabat, Intensive Care Unit: Prof A Ghannam, Prof Z Belkhadir.

## Palestine

*Participating ICUs:* ICU, Alia governmental hospital, Hebron / West Bank, Palestine: Dr. Sarah Amro. Gaza city, Alshifaa hospital, Gaza, Palestine: DR. Mustafa Abu Jayyab.

## Qatar

*National Coordinator:* Dr Ali Aithssain

*Participating ICUs:* Hamad General Hospital, Medical Icu: Dr Ali Ait Hssain, Dr Abdurahaman Elbuzidi. Al Wakrah Hospital, Critical Care: Dr Edin Karic. Hamad General Hospital, Sicu: Dr Marcus Lance, Dr Shaikh Nissar.

## Saudi Arabia

*Participating ICUs:* King Faisal Specialist Hospital & Research Center, Adult Critical Care Medicine: Dr Hend Sallam. Prince Sultan Medical Military Center, Intensive Care Unit: Dr Omar Elrabi, Dr Ghaleb A Almekhlafi. Security Force Hospital - Riyadh, Critical Care Unit: Dr Maher Awad, Dr Ahmed Aljabbary.

## Syria

*Participating ICUs:* Al Mouwasat University Hospital, Icu: Dr Mohammad Karam Chaaban. Assad University Hospital, Neurological Intensive Care Unit: Dr Natalia Abu-Sayf. Damascus University Cardiac Surgery Hospital Near Al-Mouwasat University Hospital, Mazzeh Kiwan, Cardiac Surgery Icu: Dr Mohammad Al-Jadaan, Miss Lubna Bakr.

## Tunisia

*National Coordinator:* Dr Mounir Bouaziz

*Participating ICUs:* Habib Bourguiba University Hospital, Department of Intensive Care: Dr Mounir Bouaziz, Dr Olfa Turki. Military Hospital of Tunis, Department of Anesthesiology And Intensive Care Unit, Lr12dn01: Pr Walid Sellami.



## Latin America and The Caribbean

### Argentina

*National Coordinator:* Dr. Gabriela Vidal

*Participating ICUs:* Hcas Cuenca Alta, Terapia Intensiva: Dr Pablo Centeno, Lic Natalia Morvillo. Hospital Central De Formosa, Servicio De Terapia Intensiva: Dr José Oscar Acevedo, Dr Patricia Mabel Lopez. Hospital Español De Mendoza, Terapia Intensiva De Adultos: Dr Rubén Fernández, Dr Matías Segura. Hospital Zatti, Ucia: Dra Marta Aparicio, Microbiologa Irene Alonzo. Instituto De Diagnostico De La Plata, Unidad De Terapia Intensiva: Dr Yanina Nuccetelli, Dr Pablo Montefiore.

### Colombia

*National Coordinator:* Mario Arias

*Participating ICUs:* Clinica Universidad De La Sabana, Critical Care Unit : Dr Luis Felipe Reyes. Universidad De La Sabana, Infectious Diseases Department: Dr Luis Felipe Reyes.

### Mexico

*National Coordinator:* Dr Silvio A. Ñamendys-Silva

*Participating ICUs:* Hospital Medica Sur, Department of Critical Care Medicine: Dr Silvio A. Ñamendys-Silva, Dr Juan P. Romero-Gonzalez. Centenario Hospital Miguel Hidalgo, Centenario Hospital Miguel Hidalgo: Dr Mariana Hermosillo, Dr Roberto Alejandro Castillo. Hospital General De Zona 14, Intensive Care Unit: Dr Jesús Nicolás Pantoja Leal, Dr Candy Garcia Aguilar. Hospital General Regional No.1, IMSS Tlaxcala: Dr Mara Ocotlan Gonzalez Herrera, Dr Missael Vladimir Espinoza Villafuerte. Hospital H+ Queretaro, Unidad De Terapia Intensiva Adultos: Dr Manuel Lomeli-Teran. Instituto Nacional de Ciencias Medicas y Nutricion Salvador Zubiran, Division of Pulmonary, Anesthesia and Critical Care Medicine: Dr Jose G. Dominguez-Cherit, Dr Adrian Davalos-Alvarez, Dr Silvio A. Ñamendys-Silva. UMAE Hospital de Especialidades Antonio Fraga Mouret, Centro Médico Nacional La Raza/IMSS, Terapia Intensiva Hospital de Especialidades CMN La Raza: Dr Luis Sánchez-Hurtado, Dr Brigitte Tejeda-Huezo. Hospital General San Juan del Rio, Querétaro, , Unidad de Terapia Intensiva de Adultos: Dr Orlando R Perez-Nieto, Dr Ernesto Deloya Tomas.

## Europe And Central Asia

### Belgium

*National Coordinator:* Dr. Liesbet De Bus

*Scientific Committee:* Prof. Jan De Waele

*Recruitment of participating ICUs worldwide:* Mr. Guy Francois

*Participating ICUs:* Ghent University Hospital, Intensive Care Unit: Dr Liesbet De Bus, Dr Jan De Waele. A.S.Z., Iz: Dr Isabelle Hollevoet. Az Nikolaas, Icu: Dr Wouter Denys. Az Sint-Jan Av Brugge - Oostende Campus Brugge, Icu: Dr Marc Bourgeois. Az Sint-Lucas, Department of Intensive Care: Dr Sofie F.M. Vanderhaeghen. Centre Hospitalier De Jolimont, Soins Intensifs : Dr Jean-Baptiste Mesland, Dr Pierre Henin. Chu Ambroise Paré, Unité Des Soins Intensifs : Dr Lionel Haentjens. Chu Charleroi, Medico-Surgical Icu: Dr Patrick Biston, Mrs Cindérella Noel. Chu Liège, Soins Intensifs : Dr Nathalie Layos, Dr Benoît Misset. Clinique Saint-Pierre, Intensive Care Unit : Dr Nicolas De Schryver, Dr Nicolas Serck. Cliniques Universitaires Saint-Luc, UCLouvain, Soins Intensifs : Dr Xavier Wittebole. Uzbrussel, Intensieve Zorgen: Prof Elisabeth De Waele, Mrs Godelive Opdenacker.

### Bosnia And Herzegovina

*National Coordinator:* Dr Pedja Kovacevic

*Participating ICUs:* University Clinical Centre of The Republic Of Srpska, Medical Intensive Care Unit: Dr Pedja Kovacevic, Dr Biljana Zlojutro.

### Croatia

*National Coordinator:* Dr Ina Filipovic-Grcic

*Participating ICUs:* General Hospital Dubrovnik, Anesthesiology, And Intensive Care: Dr Aida Custovic, Dr Ina Filipovic-Grcic. University Hospital Centre Zagreb, Medical Intensive Care Unit: Prof Radovan Radonic, Dr Ana Vujaklija Brajkovic. University

Hospital Dubrava, Clinical Department of Anesthesiology, Reanimation and Intensive Care: Prof Jasminka Persec, Dr Sanja Sakan, Dr Mario Nikolic, Dr Hrvoje Lasic.

## France

*National Coordinator:* Prof. Marc Leone

*Scientific Committee:* Prof. Jean-François Timsit, Prof. Etienne Ruppe, Mr. Stephane Ruckly, Prof. Philippe Montravers

*Participating ICUs:* Hôpital Nord, Réanimation Polyvalente et Traumatologique : Pr Marc Leone, Dr Charlotte Arbelot. Bichat Claude Bernard, Réanimation Médicale et Infectieuse : Prof Jean-François Timsit, Mme Juliette Patrier. Bichat-Claude Bernard Hospital, Ap-Hp, Anesthesiology And Critical Care Medicine Department, Dmu Parabol: Dr N.Zappela, Pr P. Montravers. Centre Hospitalier De Bigorre, Service De Réanimation Polyvalente : Dr Thierry Dulac, Dr Jérémy Castanera. Centre Hospitalier De Cholet, Réanimation Polyvalente : Dr Johann Auchabie, Dr Anthony Le Meur. Centre Hospitalier De Dieppe, Médecine Intensive Réanimation : Dr A. Marchalot, Dr M. Beuzelin. Centre Hospitalier De Pau, Réanimation Polyvalente : Dr Alexandre Massri, Dr Charlotte Guesdon. Ch Annecy Genevois, Réanimation Polyvalente : Dr Etienne Escudier. Ch De Charleville-Mézières, Médecine Intensive Réanimation : Dr Philippe Mateu, Dr Jérémy Rosman. Ch Tourcoing, Service De Reanimation: Dr Olivier Leroy, Dr Serge Alfandari. Chu Compiègne Noyon, Réanimation : Dr Alexandru Nica. Chu Gabriel Montpied, Médecine Intensive Et Réanimation : Dr Bertrand Souweine, Dr Elisabeth Coupez. Chu Lille, Hôpital Roger Salengro, Pôle De Réanimation : Dr Thibault Duburcq. Chu Lille, Surgical Critical Care, Department of Anesthesiology and Critical Care: Prof Eric Kipnis, Dr Perrine Bortolotti. Chu Rennes, Service De Maladies Infectieuses Et Réanimation Médicale : Dr Mathieu Le Souhaitier. Cochin, Medecine Intensive Reanimation: Dr Jean-Paul Mira. Ghef Site De Marne-La-Vallée, Réanimation Polyvalente : Dr Pierre Garcon, Dr Matthieu Duprey. Groupe Hospitalier Nord Essonne - Site Longjumeau, Réanimation Polyvalente : Dr Martial Thyrault, Dr Rémi Paulet. Groupe Hospitalier Paris Saint Joseph, Médecine Intensive et Réanimation : Dr François Philippart, Dr Marc Tran, Dr Cédric Bruel. Hôpital Beaujon, Department of Anesthesiology and Critical Care: Dr Emmanuel Weiss, Dr Sylvie Janny, Dr Arnaud Foucier. Hopital De Gui De Chauliac, Departement Anesthesie Reanimation Gui De Chauliac : Dr Pierre-François Perrigault, Dr Flora Djanikian. Hôpital De La Source, Centre Hospitalier Régional D'Orléans, Médecine Intensive & Réanimation (Medical Icu): Dr François Barbier. Hôpital De La Timone, Médecine Intensive Réanimation : Dr Marc Gainnier, Dr Jérémy Bourenne. Hopital De Mercy, Chr Metz-Thionville, Service De Réanimation Polyvalente Et Usc: Dr Guillaume Louis. Hopital Du Scorff, Service De Réanimation : Dr Roland Smonig. Hôpital Edouard Herriot, Médecine Intensive-Réanimation : Dr Laurent Argaud, Dr Thomas Baudry. Hôpital Henri Mondor, Service De Réanimation Médicale : Pr Armand Mekonted Dessap, Dr Keyvan Razazi. Hôpital Louis Pasteur, Réanimation : Dr Pierre Kalfon, Mr Gaëtan Badre. Montpellier University Hospital, Intensive Care Medicine Lapeyronie Hospital: Dr Romaric Larcher. Nimes University Hospital, Service Des Réanimations : Prof Jean-Yves Lefrant, Dr Claire Roger. Purpan, Réanimation Polyvalente : Dr Benjamine Sarton, Dr Stein Silva. Sorbonne Université Pitie Salpetrière, Médecine Intensive Et Réanimation Neurologique : Dr Sophie Demeret, Dr Loïc Le Guennec. Sud Essonne Hospital, Department of Intensive Care Medicine: Dr Shidasp Siami, Mrs Christelle Aparicio. Tenon Hospital, Service De Médecine Intensive Réanimation : Dr Guillaume Voiriot, Dr Muriel Fartoukh. University Hospital Of Poitiers, Surgical And Neuro Intensive Care Units: Dr Claire Dahyot-Fizelier, Dr Nadia Imzi. University Of Montpellier, Phymedex Inserm Cnrs: Dr Kada Klouche.

## Germany

*National Coordinator:* Prof. Hendrik Bracht

*Participating ICUs:* University Hospital Ulm, Icu G1: Dr Hendrik Bracht, Dr Sandra Hoheisen. Jena University Hospital, Dept. Of Anesthesiology and Intensive Care Medicine: Dr Frank Bloos, Dr Daniel Thomas-Rueddel. Universitätsklinikum Leipzig, Medical Icu: Dr Sirak Petros, Dr Bastian Pasioka. University Hospital Heidelberg, Station 13 Iopsis: Dr Simon Dubler, Dr Karsten Schmidt. University Hospital Muenster, Department of Anesthesiology, Intensive Care Medicine and Pain Therapy: Dr Antje Gottschalk, Dr Carola Wempe. University Hospital of Saarland, Dept. Of Internal Medicine V - Pneumology, Allergology and Critical Care Medicine: Prof Philippe Lepper, Dr Carlos Metz.

## Kazakhstan

*National Coordinator:* Dr. Dmitriy Viderman

*Participating ICUs:* University Medical Center, National Research Oncology Center, Intensive Care Unit: Dr Dmitriy Viderman, Dr Yerlan Ymbetzhonov. Karaganda Medical University, Department of Emergency Medicine, Anesthesiology and Resuscitation Non-Commercial Joint-Stock Company: Associate Prof., Dr Miras Mugazov, Dr Yelena Bazhykayeva. Medical Center Hospital of The President's Affairs Administration of The Republic of Kazakhstan, Intensive Care Unit: Dr Zhannur Kaligozhin, Dr Baurzhan Babashev. National Research Oncology Center, Department of Oncohematological Resuscitation, Resuscitation, Intensive Care: Dr Yevgeniy Merenkov, Dr Talgat Temirov.

## Greece

*National Coordinator:* Dr. Kostoula Arvaniti

*Participating ICUs:* Papageorgiou Hospital, Intensive Care Unit: Dr Kostoula Arvaniti, Dr Dimitrios Smyrniotis. Agioi Anargiroi Hospital, Agioi Anargiroi Icu: Dr Vasiliki Psallida, Dr Georgios Fildisis. G Papanikolaou General Hospital, 1st Icu: Dr Vasiliki Soulountsi, Dr Evangelos Kaimakamis. G Papanikolaou General Hospital, B Icu: Dr Cristina Iasonidou, Dr Sofia Papoti. General Hospital G. Gennimatas, Gnth "G Gennimatas": Dr Foteini Renta, Dr Maria Vasileiou. General Hospital of Athens G. Gennimatas, Icu: Dr Vasiliki Romanou, Dr Vasiliki Koutsoukou. Gh Imathia Veria, Icu: Dr Mariana Kristina Matei, Dr Leora Moldovan. Icu, Hygeia General Hospital: Dr Ilias Karaikos, Dr Harry Paskalis. Intensive Care Unit, General Hospital of Giannitsa: Dr Kyriaki Marmanidou. Intensive Care Unit, Hippocraton General Hospital Of Athens: Dr M. Papanikolaou, Dr C.Kampolis. Katerini General Hospital, GnK Icu: Dr Marina Oikonomou, Dr Evangelos Kogkopoulos. Konstantopoulion-Patision Hospital, Icu: Dr Charikleia Nikolaou, Dr Anastasios Sakkalis. Mediterraneo Hospital, Icu/Hdu : Dr Marinos Chatzis, Dr Maria Georgopoulou. Saint Savvas Hospital, Icu: Dr Anna Efthymiou, Dr Vasiliki Chantziara. Sismanogleio Hospital, Sismanogleion Icu: Dr Aikaterini Sakagianni, Dr Zoi (Zoe) Athanasa (Athanassa). Theageneio Anticancer Hospital, Icu: Dr Eirini Papageorgiou, Dr Fadi Ali. University Hospital Attikon, National And Kapodistrian University Of Athens, Department Of Critical Care: Pr Georges Dimopoulos, Dr Mariota Panagiota Almiroudi. University Hospital Heraklion, Department of Intensive Care: Dr Polychronis Malliotakis, Dr Diamantina Marouli. University Hospital of Alexandroupolis, Department Of Intensive Care: Dr Vasiliki Theodorou, Dr Ioannis Retselas. University Hospital of Ioannina, Intensive Care Unit: Pr Vasilios Kouroulas, A/Pr Georgios Papathanakos.

## Italy

*National Coordinator:* Prof. Matteo Bassetti and Dr. Daniele Giacobbe

*Participating ICUs:* Città Della Salute E Della Scienza - Molinette, Anestesia E Rianimazione Universitaria: Dr Giorgia Montrucchio, Dr Gabriele Sales. Fondazione Policlinico Universitario A. Gemelli Irccs. Università Cattolica Del Sacro Cuore. Italy, Uoc Di Anestesia, Rianimazione, Terapia Intensiva E Tossicologia Clinica: Dr Gennaro De Pascale, Dr Luca Maria Montini, Dr Simone Carelli, Dr Joel Vargas, Ms Valentina Di Gravio. Irccs Ospedale Policlinico San Martino, U.O. Anestesia E Rianimazione: Prof Daniele Roberto Giacobbe, Dr Angelo Gratarola, Dr Elisa Porcile, Dr Michele Mirabella. Irccs Sacro Cuore Don Calabria, Terapia Intensiva: Dr Ivan Daroui, Dr Giovanni Lodi. Madonna Delle Grazie, U.O.C. Anestesia E Rianimazione: Dr Francesco Zuccaro, Dr Maria Grazia Schlevenin. Ospedale Policlinico San Martino, Irccs Per L'oncologia E Le Neuroscienze, Uo Clinica Anestesiologica E Terapia Intensiva: Prof Paolo Pelosi, Dr Denise Battaglini. Policlinico Paolo Giaccone, Università Degli Studi Di Palermo, Terapia Intensiva Polivalente: Dr Andrea Cortegiani, Dr Mariachiara Ippolito, Dr Davide Bellina, Dr Andrea Di Guardo. Regina Elena National Cancer Institute of Rome, Anesthesia and Intensive Care Department: Dr Lorella Pelagalli, Dr Marco Covotta. Sant'andrea Hospital Sapienza University of Rome, Department of Medical And Surgical Science And Translational Medicine Intensive Care Unit: Dr Monica Rocco, Dr Silvia Fiorelli. University Hospital O.O.R.R., Department of Anesthesia And Intensive Care: Prof Antonella Cotoia, Dr Anna Chiara Rizzo.

## Poland

*National Coordinator:* Dr Adam Mikstacki

*Participating ICUs:* Hospital In Puszczkovo, Poznan University of Medical Sciences, Department of Anaesthesiology and Intensive Therapy: Dr Adam Mikstacki, Dr Barbara Tamowicz. 10 Wojskowy Szpital Kliniczny, Oddział Kliniczny Anestezjologii I Intensywnej Terapii: Dr Irmina Kaptur Komorowska, Dr Anna Szczesniak. Szpital Wojewodzki W Opolu, Oddział Anestezjologii I Intensywnej Terapii: Dr Jozef Bojko, Dr Anna Kotkowska. Uck Wum, Oddział Intensywnej Terapii (Icu ): Dr Paulina Walczak-Wieteska, Dr Dominika Wasowska. Wojewodzki Szpital Zespólny, Oddział Anestezjologii I Intensywnej Terapii: Dr Tomasz Nowakowski, Dr Hanna Broda. Wss Im. Wl. Bieganskiego, Oddział Anestezjologii I Intensywnej Terapii - Ośrodek Pozaustrojowych Technik Wspomagania Czynności Nerek I Wątroby: Prof Assoc Mariusz Peichota, Dr Iwona Pietraszek-Grzywaczewska.

## Republic Of Ireland

*National Coordinator:* Prof Ignacio Martin-Loeches

*Participating ICUs:* St Jame's Hospital, Intensive Care Unit: Prof Ignacio Martin-Loeches, Dr Alessandra Bisanti.

## Portugal

*National Coordinator: Prof. José Artur Paiva*

*Scientific Committee: Prof. Pedro Póvoa*

*Participating Icus: Centro Hospitalar Medio Tejo - Unidade Abrantes, Ucip: Dr Nuno Cartoze, Dr Tiago Pereira. Centro Hospitalar Universitário do Porto, Sci 1: Dr Nádia Guimarães, Dr Madalena Alves. Centro Hospitalar Vila Nova De Gaia/Espinho, Unidade De Cuidados Intensivos Polivalente: Dr Ana Josefina Pinheiro Marques, Dr Ana Rios Pinto. CHUA Faro, Smi-1 : Dr Andriy Krystopchuk, Dr Ana Teresa. Hospital De Cascais Dr Jose De Almeida, Unidade de Cuidados Intensivos: Dr António Manuel Pereira de Figueiredo, Dr Isabel Botelho. Hospital Curry Cabral, Intensive Care Medicine Department: Dr Tiago Duarte. Hospital Sao Francisco Xavier, CHLO, Unidade De Cuidados Intensivos Polivalente: Dr Vasco Costa, Dr Rui Pedro Cunha. Hospital Pedro Hispano, Serviço De Medicina Intensiva: Dr Elena Molinos, Dr Tito da Costa. CHULC, Hospital Sao José, Unidade de Urgência Médica: Dr Sara Ledo, Dr Joana Queiró. ULS Litoral Alentejano, Serviço de Medicina Intensiva: Dr Dulce Pascoalinho. ULS Nordeste, Unidade de Cuidados Intensivos: Dr Cristina Nunes. ULSAM, UCI: Dr José Pedro Moura, Dr Énio Pereira. ULS Baixo Alentejo, Unidade Cuidados Intensivos Polivalente: Dr António Carvalho Mendes.*

## Romania

*National Coordinator: Dr Liana Valeanu*

*Participating ICUs: Emergency Institute for Cardiovascular Diseases Prof. Dr. C. C. Iliescu, 1st Anesthesia and Intensive Care Department: Dr Liana Valeanu, Prof Serban Bubenek-Turconi. Clinical Emergency Hospital Bucharest, Anesthesia and Intensive Care Department: Prof Ioana Marina Grintescu, Dr Cristian Cobilinschi. Emergency Institute for Cardiovascular Diseases Prof. Dr. C. C. Iliescu, 2nd Anesthesia and Intensive Care Department: Prof Daniela Carmen Filipescu, Dr Cornelia Elena Predoi. Fundeni Clinical Institute, 3rd Department of Anesthesia and Intensive Care: Prof Dana Tomescu, Dr Mihai Popescu, Dr Alexandra Marcu. University Of Medicine and Pharmacy "Grigore T Popa", Anesthesia and Intensive Care Department: Prof Ioana Grigoras, Dr Olga Lungu.*

## Russian Federation

*National Coordinator: Prof. Alexey Gritsan*

*Participating ICUs: V.F. Voino-Yasenetsky Krasnoyarsk State Medical University, Krasnoyarsk Regional Clinical Hospital, Dep. Anaesthesiology and Intensive Care #3: Prof Alexey Gritsan. City Clinical N.I.Pirogov Hospital, Clinical Pharmacology: Dr Anastasia Anderzhanova, Dr Yulia Meleshkina. City Clinical N.I.Pirogov Hospital, Icu: Dr Marat Magomedov. E.A. Vagner Perm State Medical University, Intensive Care Unit: Prof Nadezhda Zubareva, Dr Maksim Tribulev. Krasnoyarsk Regional Clinical Hospital, Dep. Anaesthesiology and Intensive Care #3: Dr Denis Gaigolnik. Petrovsky National Research Centre of Surgery, Intensive Care: Dr Aleksandr Eremenko, Dr Natala Vistovskaya, Dr Maria Chukina. Privolzhskiy District Medical Center, Department Anesthesiology and Intensive Care: Dr Vladislav Belskiy, Dr Mikhail Furman.*

## Spain

*National Coordinator: Dr. Ricard Ferrer Rocca*

*Participating ICUs: Vall D'herbon, Intensive Care Medicine: Dr Ricard Ferrer Rocca, Dr Maria Martinez, Dr Vanessa Casares. Hospital Clinic De Barcelona, Surgical Icu: Dr Ricard Mellado Artigas. Hospital De La Santa Creu I Sant Pau, Intensive Care Unit : Dr Paula Vera, Dr Matias Flores. Hospital De Terrassa, Medicina Intensiva: Dr Joaquin Amador Amerigo. Hospital Del Mar, Critical Care Unit: Dr Maria Pilar Gracia Arnillas, Dr Rosana Munoz Bermudez. Hospital Germans Trias I Pujol, Critical Care Unit: Prof, Dr Fernando Armestar, Dr Beatriz Catalan, Dr Regina Roig, Dr Laura Raguer, Dr María Dolores Quesada. Hospital Parc Tauli, Icu: Dr Emilio Diaz Santos, Dr Gemma Gomà. Hospital Punta De Europa, Intensive Care Unit : Dr Alejandro Ubeda, Dra Maria Salgado. Hospital Universitario Central De Asturia, Uci-Huca: Dr Lorena Forcelledo Espina, Dr Emilio Garcia Prieto. Hospital Universitario La Paz, Intensive Care Unit, Servicio De Medicina Intensiva: Dra Mj Asensio, Dra M. Rodriguez. Hospital Universitario La Paz, Surgical Critical Care Unit : Dr Emilio Maseda, Dr Alejandro Suarez De La Rica. Hospital Universitarion Son Espases, Unidad De Cuidados Intensivos: Dr J Ignacio Ayestaran, Dr Mariana Novo. University Hospital Severo Ochoa, Intensive Care Unit: Dr Miguel Angel Blasco-Navalpoto, Dr Alberto Orejas Gallego.*

## Sweden

*National Coordinator:* Dr Fredrik Sjövall

*Participating ICUs:* Skane University Hospital, Intensive- And Perioperative Care: Dr Fredrik Sjövall, Dr Dzana Spahic. Ostra Sjukhuset Sahlgrenska University Hospital, Anopiva: Dr Carl Johan Svensson. Umeå University, Anesthesiology and Intensive Care Medicine, Surgical and Perioperative Sciences: Dr Michael Haney, Dr Alicia Edin. Universitetssjukhuset I Linköping, Anopiva: Dr Joyce Åkerlund, Dr Lina De Geer.

## Switzerland

*National Coordinator:* Dr. Josef Prazak

*Scientific Committee:* Dr. Niccolò Buetti

*Participating ICUs:* Inselspital, Bern University Hospital, Department of Intensive Care Medicine: Dr Josef Prazak, Dr Stephan Jakob. Chuv, Service De Médecine Intensive Adulte : Dr JI Pagani, Mrs S Abed-Maillard.

## Turkey

*National Coordinator:* Prof. Murat Akova, Dr. Abdullah Tarık Aslan

*Participating ICUs:* Hacettepe University of Faculty of Medicine, Intensive Care Unit(ICU): Dr Murat Akova, Dr Abdullah Tarık Aslan, Abdurrahman Yurtaslan Ankara Oncology Training and Research Hospital, Department of Anesthesiology: Dr Arif Timuroglu. Acibadem Fulya Hospital, Infectious Diseases: Dr Sesin Kocagoz, Dr Hulya Kusoglu. Acibadem Kadikoy Hospital, ICU: Dr Selcuk Mehtap, Dr Solakoğlu Ceyhun. Ankara University Faculty Medicine Ibni Sina Hospital, Medical ICU: Prof. Dr. Neriman Defne Altintas, Dr Leyla Talan. Ankara Yildirim Beyazit University, Ankara City Hospital, Infectious Diseases and Clinical Microbiology: Dr Bircan Kayaaslan, Dr Ayşe Kaya Kalem. Aydın Adnan Menderes University Research Hospital, Anesthesia and Reanimation ICU: Prof. Dr. Ibrahim Kurt, Dr (Professor) Murat Telli, Dr (Associate Professor) Barcin Ozturk. Baskent University Hospital, Infectious Diseases and Clinical Microbiology: Dr Çiğdem Erol. Bitlis Government Central Hospital, Bitlis Icu: Dr Emine Kubra Dindar Demiray, Dr Sait Çolak. Duzce University Hospital, Medical ICU: Dr Türkay Akbas. Erciyes University, ICU: Prof. Dr. Kursat Gundogan, Dr Ali Sari. Fatih Sultan Mehmet Research and Training Hospital, Infection Diseases: Dr Canan Agalar, Dr Onur Çolak. Hitit University Erol Olcok Education and Research Hospital, Infectious Diseases and Clinical Microbiology: Prof. Dr. Nurcan (N) Baykam, Assistant Prof. Dr Ozlem (O) Akdogan. Istanbul Medipol University, Kosuyolu Hospital, Infectious Diseases and Clinical Microbiology: Dr Mesut Yilmaz, Dr Burcu Tunay, Dr Rumeysa Cakmak. Istanbul University-Cerrahpasa, Cerrahpasa Medical Faculty, Sadi Sun ICU: Prof.Dr. Nese Saltoglu, Ass Prof.Dr. Ridvan Karaali. Karadeniz Technical University Faculty of Medicine, Infectious Disease and Clinical Microbiology: Prof Dr. Iftihar Koksai, Assist. Prof. Firdevs Aksoy. Karadeniz Technical University Farabi Hospital, Anesthesia ICU 1: Dr Ahmet Eroglu. Kartal Dr. Lutfi Kirdar Training and Research Hospital, ICU: Dr Kemal Tolga Saracoglu, Dr Yeliz Bilir. Kayseri City Hospital, ICU: Dr Seda Guzeldag. Mersin University Hospital, Department of Infectious Diseases and Clinical Microbiology: Dr Gulden Ersoz, Dr Guliz Evik. Pamukkale Univ, Anesthesiology and Reanimation: Prof Hulya Sungurtekin, Dr Cansu Ozgen. School Of Medicine, Medipol Mega University Hospitals Complex, Department of Anesthesiology and Reanimation: Dr Cem Erdoğan. University of Health Sciences Diskapi Yildirim Beyazit Training and Research Hospital, The Department of Infectious Diseases and Clinical Microbiology and ICU: Dr Yunus Gürbüz, Dr Nilgün Altin. Turgut Ozal Medical Center, Department of Infectious Diseases and Clinical Microbiology: Dr Yasar Bayindir, Dr Yasemin Ersoy. University of Health Sciences Istanbul Umraniye Training and Research Hospital, Anaesthesia and Reanimation: Dr Senay Goksu, Dr Ahmet Akyol. University of Health Sciences, Kartal Dr. Lutfi Kirdar Training and Research Hospital, Infectious Diseases and Clinical Microbiology: Prof Ayse Batirel, Dr Sabahat Cagan Aktas.

## **The United Kingdom**

*National Coordinator:* Dr. Andrew Conway Morris

*Participating ICUs:* Addenbrookes Hospital, John V Farman Intensive Care Unit: Dr Andrew Conway Morris, Dr Matthew Routledge. Addenbrookes Hospital, Neurocritical Care Unit (NCCU): Dr Andrew Conway Morris, Dr Ari Ercole. Charing Cross Hospital - Imperial College NHS Trust, Intensive Care Unit, Level 11: Dr David Antcliffe, Ms Roceld Rojo. Countess Of Chester Foundation Trust, Intensive Care Unit: Dr Kate Tizard, Dr Maria Faulkner. Darlington Memorial Hospital Intensive Care Unit, County Durham and Darlington NHS Foundation Trust: Dr Amanda Cowton, Dr Melanie Kent. Croydon University Hospital, Critical Care Unit: Dr Ashok Raj, Dr Artemis Zormpa, Dr George Tinaslanidis, Mrs Reena Khade. Department Of Anaesthetics and Intensive Care Medicine, Queen Elizabeth Hospital Birmingham: Dr Tomasz Torlinski, Dr Randeep Mulhi, Dr Shraddha Goyal, Dr Manan Bajaj, Dr Marina Soltan, Dr Aimee Yonan, Dr Rachael Dolan. Department Of Microbiology, Queen Elizabeth Hospital Birmingham: Dr Aimee Johnson. Freeman Hospital, ICCU 37: Dr Caroline Macfie, Dr James Lennard. Hammersmith Hospital - Imperial College NHS Trust, Intensive Care Unit, Level 11: Ms Maie Templeton, Ms Sonia Sousa Arias. James Cook University Hospital, Icu2/3: Dr Uwe Franke, Mr Keith Hugill. Medway Maritime Hospital, Intensive Care Unit: Mrs Hollie Angell. Ninewells Hospital and Medical School NHS Tayside, Intensive Care Unit: Dr Benjamin J Parcell, Dr Katherine Cobb, Dr Stephen Cole. North Cumbria University Hospitals NHS Trust, North Cumbria University Hospitals NHS Trust: Dr Tim Smith, Dr Clive Graham. North Manchester General Hospital, Critical Care Ward: Dr Jaroslav Cerman, Dr Allison Keegan. Queen Elizabeth Hospital, Gateshead Health NHS Foundation Trust, Critical Care Department: Mrs Jenny Ritzema, Mrs Amanda Sanderson. Queen Elizabeth Hospital, Lewisham and Greenwich NHS Trust, Critical Care Unit: Dr Ashraf Roshdy. Royal Gwent Hospital, Critical Care Unit: Dr Tamas Szakmany, Dr Tom Baumer. Royal London Hospital, Adult Critical Care Unit: Dr Rebecca Longbottom, Dr Daniel Hall. Royal Marsden NHS Foundation Trust, Critical Care Unit: Dr Kate Tatham, Dr S Loftus, Dr A Husain, Dr E Black, Dr S Jhanji, Dr R Rao Baikady. Royal Victoria Hospital, Belfast, Regional Intensive Care Unit: Dr Peter Mcguigan, Dr Rachel Mckee. Sandwell And West Birmingham Hospitals NHS Trust, Intensive Care Unit: Dr Santhana Kannan, Dr Supriya Antrolikar, Dr Nicholas Marsden. St Mary's Hospital - Imperial College NHS Trust, Intensive Care Unit, Level 11: Dr Valentina Della Torre, Ms Dorota Banach. Stepping Hill Hospital, Stepping Hill ICU: Dr Ahmed Zaki, Dr Matthew Jackson. University Hospitals of North Midlands, Critical Care Unit: Dr Moses Chikungwa. Warwick Hospital, Intensive Care Unit: Dr Ben Attwood, Dr Jamie Patel. West Suffolk NHS Foundation Trust, Critical Care: Dr Rebecca E Tilley, Miss Sally K Humphreys. Wirral University Teaching Hospital, Intensive Care Unit: Dr Paul Jean Renaud.

## **Ukraine**

*Participating ICUs:* Kharkiv Clinical Infectious Diseases Hospital, Intensive Care: Prof Anton Sokhan, Dr Yaroslava Burma.

## **North America**

### **Canada**

*National Coordinator:* Prof. Wendy Sligl

*Participating ICUs:* University of Alberta Hospital, General Systems Intensive Care Unit (Gsicu): Dr Wendy Sligl, Nadia Baig, Lorena McCoshen. Royal Alexandra Hospital, General Systems Intensive Care Unit (Gsicu): Dr Demetrios J Kutsogiannis, Dr Wendy Sligl, Patricia Thompson, Tayne Hewer.

## South Asia

### Bangladesh

*National Coordinator:* Dr Raihan Rabbani

*Participating ICUs:* General Icu, Dhaka: Dr Raihan Rabbani, Dr Shihan Mahmud Redwanul Huq. Asgar Ali Hospital, Critical Care Medicine: Dr Rajib Hasan, Dr Mohammad Motiul Islam.

### India

*National Coordinator:* Prof. Mohan Gurjar

*Participating ICUs:* Sanjay Gandhi Postgraduate Institute of Medical Sciences (SGPGIMS), Lucknow, Department of Critical Care Medicine: Dr Mohan Gurjar, Dr Arvind Baronia. All India Institute of Medical Sciences (AIIMS) Jodhpur, Department of Anaesthesiology & Critical Care Medicine: Dr Nikhil Kothari, Dr Ankur Sharma. All India Institute of Medical Sciences (AIIMS), Pulmonary Medicine ICU, Department of Pulmonary Medicine: Dr Saurabh Karmakar, Dr Priya Sharma. Breach Candy Hospital Trust, SICU: Dr Janardan Nimbolkar, Dr Pratit Samdani. Cauvery Heart And Multi-Speciality Hospital, MICU: Dr Vaidyanathan R, Dr Noor Ahmed Rubina. CHL Hospitals, Dept of Critical Care Services: Dr Nikhilesh Jain, Dr Madhumati Pahuja. Indira Gandhi Institute of Medical Sciences, Trauma & Emergency: Dr Ritu Singh, Dr Saurav Shekhar. King George's Medical University, Department of Critical Care Medicine: Dr Syed Nabeel Muzaffar, Dr Ahmad Ozair, Dr Suhail Sarwar Siddiqui. Medica Superspecialty Hospital, Medica Institute of Critical Care: Dr Payel Bose, Dr Avijatri Datta. Sir H N Reliance Foundation Hospital, Critical Care Unit: Dr Darshana Rathod, Dr Mayur Patel. Sri Ramachandra Institute of Higher Education and Research, Department of Critical Care Medicine: Prof MK Renuka, Dr Sailaja K Baby. St Johns Medical College Hospital, Department of Critical Care Medicine, MICU: Dr Carol Dsilva, Dr Jagadish Chandran. Tata Medical Center, Critical Care Medicine: Dr Pralay Ghosh, Dr Sudipta Mukherjee. Yashoda Hospital, Somajiguda, Hyderabad: Dr Kaladhar Sheshala, Dr Krushna Chandra Misra.

## Sub-Saharan Africa

### Nigeria

*National Coordinator:* Dr. Oyebola O. Adekola

*Participating ICUs:* Ahmadu Bello University Teaching Hospital Shika Zaria Abuth Zari, Icu Abuth Zaria: Dr Saidu Yusuf Yakubu, Dr Euphemia Mgbosoro Ugwu. Lagos University Teaching Hospital, Department of Anaesthesia And Intensive Care: Dr John (O) Olatosi, Dr Ibironke Desalu. One Life Hospital, One Life Intensive Care Unit: Dr Gabriel Asiyambi, Dr Motunrayo Oladimeji. University College Hospital, Anaesthesia: Dr Olusola Idowu, Dr Fowotade Adeola.

### South Africa

*National Coordinator:* Prof. Mervyn Mer

*Participating ICUs:* Charlotte Maxeke Johannesburg Academic Hospital, Ward 576: Prof Mervyn Mer, Mrs Melanie Mc Cree.

### Sudan

*National Coordinator:* Dr. Bashir El Sanousi

*Participating ICUs:* Al-Rajhi Hospital, Medicine: Dr Ali Adil Ali Karar. East Nile Hospital, Intensive Care Unit: Dr Elfayadh Saidahmed, Dr Hytham K.S. Hamid.

## References

- [1] Center for disease control and prevention C. Carbapenem-resistant Enterobacterales (CRE): CRE Technical Information, <https://www.cdc.gov/hai/organisms/cre/technical-info.html#Definition>; 2019 [accessed 22/12/2021].
- [2] Blakely TA, Woodward AJ. Ecological effects in multi-level studies. *J Epidemiol Community Health* 2000;54(5):367-74
- [3] Massart N, Maxime V, Fillatre P, Razazi K, Ferre A, Moine P, et al. Characteristics and prognosis of bloodstream infection in patients with COVID-19 admitted in the ICU: an ancillary study of the COVID-ICU study. *Ann Intensive Care* 2021;11(1):183
- [4] Fine JP, Gray RJ. A proportional hazards model for the subdistribution of a competing risk. *Journal of the American statistical association* 1999;94(446):496-509
